# Supplementary material for: Relationship between climate, environment, and anthropogenic activities in coastal North China recorded by speleothem δ&lt;sup&gt;18&lt;/sup&gt;O and δ&lt;sup&gt;13&lt;/sup&gt;C ratios in the last 1 ka
Source: Copernicus journal article supplement (doi:10.5194/cp-2017-73), 2017-07-20
Supplement: Supplementary file [file cp-2017-73-AC3-supplement.pdf]

**Author's final response - "Relationship between climate, environment, and anthropogenic activities in coastal North China recorded by speleothem  $\delta^{18}\text{O}$  and  $\delta^{13}\text{C}$  ratios in the last 1 ka)"**

Qing Wang<sup>1</sup>, Ke Cheng<sup>1</sup>, Zhihui Zheng<sup>1</sup>, Hong Chi<sup>1</sup>, Hongyan Wang<sup>1</sup>

<sup>1</sup>*Coast Institute of Ludong University, Yantai 264025, China*

*Correspondence to: Qing Wang, [schingwang@126.com](mailto:schingwang@126.com); Ke Cheng, [haian\\_cheng@126.com](mailto:haian_cheng@126.com)*

Firstly, we would like to thank two anonymous reviewers for their comments and constructive suggestions, which will improve the manuscript, and for recommending this study for publication in *Climate of the Past*.

According to the comments from the two anonymous reviewers, the main problem of this manuscript is the overlap with the previous paper published in *Climate of the Past* (Wang et al., 2016, 12, 871-881). In this paper, the stalagmite KY1 was dated by U-Th technique, and discussed the climatic-environmental meanings by  $\delta^{18}\text{O}$  and  $\delta^{13}\text{C}$  ratios. The  $\delta^{18}\text{O}$  ratios of the upper part of stalagmite KY1 has been discussed and published in Wang et al., 2016 *Clim. Past*. As for this problem, we have discussed many times about how to modify this manuscript. We decide to discuss the climatic-environmental meanings of  $\delta^{13}\text{C}$  ratios primarily, the  $\delta^{18}\text{O}$  ratios are comparison data. This manuscript has been modified. The main modifications are as follows.

1. The abstract and conclusion have been simplified.
2. We will add a picture to show the stalagmite and the sampling positions and adjust the order of all figures.
3. In section 4, we have deleted many discussions of  $\delta^{18}\text{O}$  ratios, and only retain the comparison with  $\delta^{13}\text{C}$  ratios. We have also deleted the redundant figures.
4. Some of the references have been updated.

We are still modifying this manuscript and checking the discussions and results based on the comments from the two anonymous reviewers. We will improve the expressions and consider to find language editing service by professional institution, and make the manuscript much easier to read.

The whole manuscript which are modified up to now is in the next page.

Thank you for all the people who are concerned about this manuscript.

Regards,

The authors (Qing Wang, Ke Cheng, Zhihui Zheng, Hong Chi, Hongyan Wang)

# Relationship between climate, environment, and anthropogenic activities in coastal North China recorded by speleothem $\delta^{18}\text{O}$ and $\delta^{13}\text{C}$ ratios in the last 1 ka

Qing Wang<sup>1</sup>, Ke Cheng<sup>1</sup>, Zhihui Zheng<sup>1</sup>, Hong Chi<sup>1</sup>, Hongyan Wang<sup>1</sup>

<sup>1</sup>*Coast Institute of Ludong University, Yantai 264025, China*

*Correspondence to: Qing Wang, schingwang@126.com; Ke Cheng, haian\_cheng@126.com*

**Abstract:** Stalagmite KY-1 was collected from Kaiyuan Cave, which is in the warm temperate zone and East Asia monsoon area in Shandong Peninsula, coastal Northern China. Based on the results of U-<sup>230</sup>Th-dating, continuous counting of laminae, and linear interpolation/extrapolation, we determined that the stalagmite grew over the last 1 ka between AD 892 and AD 1894. This period includes the Medieval Warm Period (MWP), Little Ice Age (LIA), and an early stage of the Current Warm Period (CWP), and corresponds to a time between the late Tang Dynasty and the late Qing Dynasty of ancient China. We collected 583 samples along the growth axis of stalagmite KY1, and selected 303 samples for  $\delta^{18}\text{O}$  and  $\delta^{13}\text{C}$  ratio measurements according to the Interval test principle to acquire a series of time data. The variation of the  $\delta^{18}\text{O}$  ratios suggest that a climatic mutation occurred in Shandong Peninsula around AD 1482, corresponding to the MWP/LIA transition period. The  $\delta^{13}\text{C}$  ratios showed overall synchronization with the  $\delta^{18}\text{O}$  ratios: both were consistent with the MWP and LIA periods, and both showed the same mutation. However, the curve of the  $\delta^{13}\text{C}$  ratios was more smooth than that of the  $\delta^{18}\text{O}$  ratios, and the variations of both were not synchronized in the late LIA. The transitions between the major dynasties in the past 1000 years of Chinese history, and the late period of Qing Dynasty coincide with the transition periods of the summer monsoon. Furthermore, the impacts of the fluctuation of the sub-climate change trend on the historical evolution of human society in MWP and LIA were more prominent than those of the violent climate transition between MWP and LIA. On the other hand, the degree of land use continually increased in the study area, which, together with the climatic change, affected the vegetation-soil-groundwater environment system in the mountainous land above the cave. The degree of impact of human land use on the mountainous vegetation, soil characteristics, and their change trends did not exceed the extent of that of climate change from AD 892–1318, but reached or exceeded small climate

changes from AD 1318–1497, and reached or exceeded the sharp climate change that occurred between AD 1483–1779. The degree of impact of human land use and the environment stabilized between AD 1779–1894, and the impacts of climate change on the environment were relatively prominent.

## 1 Introduction

Speleothems are one of the most important terrestrial archives for paleoenvironmental reconstructions (Li et al., 2011). Most previously reported studies of the Asian summer monsoon area are focused on the carbonate oxygen (O) and carbon (C) isotopes, which were used as indicators of the monsoon intensity (Dykoski et al., 2005; Wang et al., 2005; Wang et al., 2008; Liu et al., 2015; Lechleitner et al., 2016). Calcareous speleothems, which have the advantages of precise dating and high-resolution sampling, are becoming one of the best geological archives for dating of major climate shifts and high-resolution reconstruction of past climates and environments (McDermott et al., 2001; Wang et al., 2001; Burns et al., 2003; Genty et al., 2003; Yuan et al., 2004; Mangini et al., 2005; Zhang et al., 2008; Cheng et al., 2009; Baker et al., 2011; Yang et al., 2015; Jamieson et al., 2016). In 2008, we collected the stalagmite KY1 from Kaiyuan Cave in the Shandong Peninsula of northern China, a temperate zone in the East Asia Monsoon area (Zhou et al., 2010). The stalagmite grew over a period of 1 ka from the 9<sup>th</sup> century to the end of the 19<sup>th</sup> century (AD 892–AD 1894). This period includes the Little Ice Age (LIA) and Medieval Warm Period (MWP), both of which had clear records in the history of mankind and strongly influenced human society (Fagan, 1999). Based on the U-<sup>230</sup>Th high-precision dating technique and continuous laminae dating, the O and C isotopic ratios of 303 samples of KY1 were measured with an average temporal resolution of ~3 yr.

The MWP is considered to range from AD 900–1400 while the LIA ranges from AD 1500–1700 or 1850 (Lamb, 1965; Matthews, et al., 2005; Ogilvie, et al., 2001; National Research Council, 2006). However, the transformation of the two climate periods over the past 1 ka is inconsistent between different areas of the world, and locally distinct climate characteristics and change tendencies are not the same (Broecker, 2001). In Chongqing, dry climates were present during the MWP but wet climatic conditions dominated during the LIA (Li et al., 2011). However, previous investigations indicate that prominent multi-centennial dry periods occurred in Heshang Cave in southwestern China during the

LIA (Hu et al., 2008). Paulsen et al., (2003) reported the record of a 1270 yr old stalagmite from the Buddle Cave in the southern Qinling Mountains, which underwent climatic anomalies during the MWP, LIA, and Current Warm Period (CWP), and identified a significant 33 yr climatic cycle that occurred over the last 1270 years. Many scholars have recently researched the climate characteristics and trends of the Asian Monsoon climate area throughout the MWP and LIA. The areas of eastern and northern China influenced by the southeast monsoon are likely to be warm, but not as warm as the areas of southwestern China that are influenced by the southwest Monsoon in MWP (Tan, 2007). However, in central China, the MWP climate varied from dry to wet and back to dry again, and was relatively warm (Paulsen, et al., 2003). This pattern not only differs from that of the southwest monsoon area during the MWP (Fleitmann et al, 2003; Wang et al, 2005; Dykoski et al, 2005), but also from that of the areas of northern China that are influenced by the southeast monsoon. Several studies (Tan et al., 2003; Tan et al., (2007) report reconstructions of the temperature of the warm season at Shihua Cave in Beijing, providing evidence of rapid cyclical warming on a centennial scale over the last millennium. Furthermore, a comparison with other high-resolution speleothem records over the last 750 years indicates regional differences in monsoon precipitation variability between the south and the north of central China on decadal to centennial scales (Tan et al., 2009).

To date, most of the research on the Holocene paleoclimate of the Chinese mainland uses ancient karst stalagmites from the south of the Qinling Mountains-Huai River boundary and the western Qinling Mountains. In the areas north of the Qinling Mountains-Huai River boundary, only Beijing (Shihua Cave), Liaoning (Xiangshui Cave), and other minor regions have been investigated (Tan et al., 2003; Hou et al., 2003). No stalagmite samples suitable for investigation of the climate changes in the period since the MWP have been found in areas north of the Qinling Mountain-Huai River boundary or north of the boundary between the subtropical monsoon and temperate monsoon areas. This deficit is particularly apparent in Shandong peninsula and the adjacent coastal plains of east China, which belong to a typical temperate monsoon area. Furthermore, studies of environmental changes in the Asian Monsoon climate zone have not paid enough attention to the impact of the increase in anthropogenic activities since the MWP on environmental changes; many studies have deduced climate changes directly from the variability of  $\delta^{13}\text{C}$  values, which are controlled both by climate and anthropogenic activities. Therefore, this research follows the work of Wang et al., (2016), using the record of stalagmite KY1 to reconstruct in high resolution the climatic-environmental changes that occurred in the Shandong

Peninsula over the last 1 ka. This work will deepen understanding of the characteristics and driving forces of climatic-environmental changes in the temperate Asian monsoon area over the last 1 ka, and will also enrich research on the evolution of the paleoclimate of the East Asian Monsoon Area based on secondary carbonate deposits in karst caves.

## **2 Background**

Stalagmite KY1 was deposited in the Kaiyuan Cave (36°24'32"N, 118°02'05"E), located at 175 m above sea level in the northwest hilly area of Lushan Mountain in Zibo city, Shandong province (Fig.1). The Shandong Peninsula is the largest peninsula in China and is located between the Bohai Sea and Yellow Sea. The Middle Cambrian Zhangxia group (consisting of an upper layer of ooid interbedded shale, above a middle layer of shale interbedded with stratum of limestone, oolitic limestone, and algal clot limestone) and the Ordovician of the Badou and Gezhuang groups (the Badou group was named by Chen, (1976)), are widely distributed in its western region. This region is known mainly for the thick gray/dark-gray layer of micrite-thin limestone-interbedded dolomitic limestone and marl, which has a thickness of 24–238 m. The lower section is integrated with the Gezhuang group, and the upper section is disconformity with the Carboniferous Benxi group (Shandong Provincial Bureau of Geology&Mineral, 1991), which is mainly composed of Lushan Mountain (1108 m), Yishan Mountain (1031 m), and Mengshan Mountain (1156 m). The carbonate rock landforms are well developed in mountainous caves, and many caves are found outcropping on the surface. The well-developed secondary carbonate sedimentary bodies have typical morphological characteristics.

Kaiyuan Cave developed in the dolomite of the Ordovician Zhifangzhuang formation, and the strata have a total thickness of ~110 m. The total length of the cave is 1280 m, and the overall distribution is a northwest–southeast strike with twists and turns; the width of the space inside the cave is typically 2–8 m and can be up to 30 m. At the top of the cave, the surface of the bedrock is covered by soil with a general thickness of 50–80 cm and up to a maximum thickness of 1.0 m. The soil types are calcareous rocky soil and drab soil (The Soil and Fertilizer Workstation of Shandong Province, 1994), giving priority to broad-leaved forest and xerophytic forest and grass vegetation. The original local vegetation consists of temperate deciduous and broad-leaved trees, which were anthropogenically deforested, and have been replaced with shrubs and grasses including *ziziphus jujuba*, *bramble*, and *bothriochloa kuntze*. The area

around Kaiyuan Cave is currently influenced by both summer and winter monsoons, with an annual precipitation of ~620 mm and an annual mean temperature of ~13 °C. Summer monsoons prevail during July and August, contributing to half of the annual precipitation (Fig. 2).

### 3 Analytical methods and data processing

The stalagmite KY1 was 75.0 mm in total length and conical in shape, consisting of very pure calcite. No hiatus was observed by microscopy on the polished surface or the laminae during its growing process. The upper part (0–42.769 mm) of KY1 comprised 678 typical transmitting annual laminae overlaid by continuous deposits. We collected samples from locations at 5 mm, 15 mm, 25 mm, 45 mm, and 64.5 mm, and then determined the age using the U-<sup>230</sup>Th high-precision dating technique at the High-Precision Mass Spectrometry and Environment Change Laboratory (HISPEC) of the National Taiwan University (Fig.3). KY1 have thorium concentrations ranging from 704 to 5147 ppt (Table 1) (Shen et al., 2002).

Since KY1 had no hiatus in its growth, the upper part (0–42.769 mm) is composed of 678 clear and continuous laminae, and the continuous laminae have clear chronology meanings. The timescale of this upper part of KY1 was established by Wang et al., (2016) by counting the annual laminae layer-by-layer to deduce the sedimentation time of each lamina. We counted in the upward and downward directions of this upper part using the laminae that were dated with U-<sup>230</sup>Th technique as markers to confirm the formation dates of the 1<sup>st</sup> and 678<sup>th</sup> laminae, then confirmed the date of each laminae according to its position. In the lower part of KY1 (42.769–75 mm), we used the methods of interpolation and extrapolation to calculate the average growth rate to determine the sedimentation time, and established a timescale based on the U-<sup>230</sup>Th dating results. Then, we calculated the average deposition rate of different laminae according to the age of the 678<sup>th</sup> laminae and the U-<sup>230</sup>Th dating results of the lower part, and linearly interpolated and extrapolated the age of the lower part (Fig.4).

KY1 was halved along its growth axis. Firstly, we collected four equally spaced samples, each at 20 mm from the growth center, along with samples at 9.5 and 18.5 mm from the top and perpendicular to growth axis, respectively, for Hendy tests. Secondly, a 4 × 5 × 75 mm (depth × width × length) stone strip was collected along the growth axis of KY1 in its development center. A total of 583 samples were taken from this strip using a medical scalpel to scrape from top to bottom, with a sampling density of

7–8 samples/mm (average separation distance of 0.1296 mm). Then, 303 samples were selected for  $\delta^{18}\text{O}$  and  $\delta^{13}\text{C}$  ratios measurement. We counted the laminae and used interpolation/extrapolation of the average growth rate to determine the sedimentation time of the 303 samples and establish an age model for KY1. Finally, we analyzed the impact of climate and environmental evolution.

Analyses of the stable oxygen and carbon isotope ratios ( $\delta^{18}\text{O}$  and  $\delta^{13}\text{C}$  ratios) were conducted along the growth center of KY1 with a temporal resolution of ~3 years.  $\delta^{18}\text{O}$  and  $\delta^{13}\text{C}$  isotopes were measured using an automated individual-carbonate reaction (Kiel) device coupled with a Thermo-Fisher MAT 253 mass spectrometer at the State Key Laboratory of Palaeobiology and Stratigraphy of the Nanjing Institute of Geology and Palaeontology, Chinese Academy of Sciences. Each powdered sample (~0.08 to 0.1 mg of carbonate) was reacted with 103%  $\text{H}_3\text{PO}_4$  at 90 °C to liberate sufficient  $\text{CO}_2$  for isotopic analysis. The standard used was NBS19, and one standard was analyzed with every ten samples. One sample out of ten was duplicated to check the replication. All isotope ratios are reported in permil (‰) deviations relative to the Vienna Pee Dee Belemnite (VPDB) standard in a conventional manner. The standard deviation ( $1\sigma$ ) for replicate measurements on NBS-19 is  $< \pm 0.10\text{‰}$  for  $\delta^{18}\text{O}$  and  $< \pm 0.03\text{‰}$  for  $\delta^{13}\text{C}$ .

## 4 Results and discussion

### 4.1 Timescale of KY1

The upper part of KY1 developed between  $\text{AD } 1217 \pm 20$  and  $\text{AD } 1894 \pm 20$  (Wang et al., 2016). In the lower part of KY1, the  $\text{U-}^{230}\text{Th}$  dating results of the samples taken at 45 and 64.5 mm were  $916.3 \pm 39.6$  and  $1015.1 \pm 74.5$  yr BP, respectively, corresponding to  $\text{AD } 1096.7 \pm 39.6$  and  $997.9 \pm 74.5$  (Table.1). Considering the isotopic dating errors, the date ranges ( $\text{AD } 1057\text{--}1137$  and  $\text{AD } 923\text{--}1073$ ) of these two sample positions (45 and 64.5mm) overlap, and the ages of the samples at 75 mm ( $\text{AD } 945$ ) and 64.5 mm ( $\text{AD } 998 \pm 75$ ) that were extrapolated from the average deposition rate also overlap (Fig. 4). However, if we calculate the average deposition rate according to the ages of the samples at 75 mm ( $\text{AD } 945$ ) and 42.769 mm ( $\text{AD } 1217 \pm 20$ ), there is more than a ten-fold difference in the section intervals for the samples at 42.769–45 mm ( $0.018438 \text{ mm yr}^{-1}$ ) and the section intervals at 45–64.5 mm ( $0.1969696 \text{ mm yr}^{-1}$ ). Thus, we interpolated the age of the section intervals for samples at 42.769–64.5 mm using the average deposition rate ( $0.0987772 \text{ mm yr}^{-1}$ ) for this section, and extrapolated the age of

the section interval for samples at 64.5–75 mm. This process yielded the age of the laminae at 75 mm (AD 892). Since no hiatus was observed on the polished surface or in the thin section by microscopy, KY1 was assumed to have grown continuously between AD 892 and AD 1894 (Fig. 4).

## 4.2 Hendy test results

The  $\delta^{18}\text{O}$  and  $\delta^{13}\text{C}$  ratios of the four equally spaced samples and those collected 9.5 and 18.5 mm from the top and perpendicular to growth axis, respectively, indicated that the composition of KY1 was consistent across same positions (Table 2). One sample (KY1-9/10-5) showed a larger  $\delta^{13}\text{C}$  ratio ( $-3.368\text{‰}$ ) than others in the same position, which had an average value of  $-4.065\text{‰}$ . The reasons for this variation may be an inaccuracy in the sampling position of KY1-9/10-5, or that the wrong sample was measured, since the  $\delta^{13}\text{C}$  ratio ( $-4.038\text{‰}$ ) of another sample (KY1-10-04) collected from the same position was consistent with the average  $\delta^{13}\text{C}$  value of the other three samples ( $-4.065\text{‰}$ ). The scatterplot of the  $\delta^{13}\text{C}$ – $\delta^{18}\text{O}$  ratios of the 303 samples shows no correlation between the  $\delta^{13}\text{C}$  and  $\delta^{18}\text{O}$  ratios of KY1 ( $R^2 = 0.21$ ) (Fig.5). Thus, the Hendy test results suggest that the calcite in KY1 was deposited under conditions of isotopic equilibrium. The possibility of dynamic fractionation of the calcite is small in the sedimentary process; therefore, the  $\delta^{18}\text{O}$  ratio of a stalagmite mainly reflects the original external climate (Hendy, 1971; Johnson et al., 2006; Wang et al., 2016).

## 4.3 The variability of KY1 $\delta^{18}\text{O}$ and $\delta^{13}\text{C}$ ratios

The  $\delta^{18}\text{O}$  ratios of KY1 ranged from  $-6.247$  to  $-8.682\text{‰}$ , with average, maximum, and minimum values of  $-7.8$ ,  $-6.247\text{‰}$  in AD 1603, and  $-8.682\text{‰}$  in AD 930, respectively (Fig. 6A). In the past 1 ka, the  $\delta^{18}\text{O}$  ratios showed clear stages of variation; a low value-low fluctuation period followed by periods of high value-high fluctuation period appeared before and after AD 1482, which exhibited a series of centennial to multi-centennial fluctuations including the MWP and LIA. The MWP was indicated by a low value-low fluctuation period (with an average value of  $-8.0399\text{‰}$ ) lasting for 590 years between AD 892 and 1482. In this period, relatively  $\delta^{18}\text{O}$  high values were observed in around AD 900, AD 950–1050, and AD 1180–1300, indicating three small climatic fluctuations in the record of stalagmite KY1 during the MWP. The LIA was indicated by a high value-high fluctuation period (average of  $-7.5980\text{‰}$ ) of 403 years, from AD 1482 to AD 1885. In the period from AD 892 to AD 1894, extreme  $\delta^{18}\text{O}$  ratios were observed in AD 1498, 1603 (the maximum value), 1687, and 1885, each preceded and succeeded



by sharp fluctuations. In AD 1746, the  $\delta^{18}\text{O}$  ratios of KY1 returned to its AD 1482 level, but then rose dramatically between AD 1871 and AD 1885.

Over the last 1 ka of the KY1 record, the  $\delta^{13}\text{C}$  ratios ranged from  $-9.691\text{‰}$  to  $-3.095\text{‰}$ , with the maximum value ( $-3.095\text{‰}$ ) appearing in AD 1779, the minimum value ( $-9.691\text{‰}$ ) appearing in AD 1318, and an average value of  $-7.3208\text{‰}$  (Fig. 6B). The  $\delta^{13}\text{C}$  value records have received extensive attention during this period, and showed clear stages of consistent variation during this period, which can be divided into two sub-stages: low- and high-value. The low-value (average of  $-8.9329\text{‰}$ ) period lasted 590 years, from AD 892–1482, and the high-value period (average of  $-4.7931\text{‰}$ ) lasted 412 years, from AD 1482–1894. The  $\delta^{13}\text{C}$  value increased for 297 years during the high-value stage, before reaching its maximum in AD 1779. This build-up phase was far longer than subsequent decline (115 yr). The  $\delta^{13}\text{C}$  ratio curve suggests that mutations occurred in AD 1482, and the lower period switched changed rapidly into the subsequent high-value period.

The  $\delta^{13}\text{C}$  value depends on the water-rock interaction in the overlying strata of the cave, the paleo-vegetation on the surface including the relative proportions of the C3- versus C4-plants and the bio-productivity. Thus, the variation of the  $\delta^{13}\text{C}$  ratio reflects the surface environment of the cave, especially the evolution of the vegetation–soil-groundwater system. The relationship between the  $\delta^{13}\text{C}$  value and the water-rock interaction (Banner et al., 1996; Baker et al., 1997), the paleovegetation (including the relative proportions of the C3- versus C4-plants) (Holmgren et al., 1995; Dorale et al., 1998), and the bio-productivity (Genty et al., 2003) is such that higher proportions of C3- versus C4-plants, increased bio-productivity, and lower water-rock interaction all contribute to lower  $\delta^{13}\text{C}$  ratios, and vice versa. The  $\delta^{13}\text{C}$  ratios of KY1 indicate a lower proportion of C3- versus C4-plants, lower bio-productivity, and less water-rock interaction before AD 1482. After this time, a mutation to higher proportions of C3- versus C4-plants, higher bio-productivity, and more water-rock interaction led to  $\delta^{13}\text{C}$  values reaching a maximum in AD 1779. The  $\delta^{13}\text{C}$  value then began to decline, but remained much higher than the AD 1482 level until KY1 stopped growing.

#### **4.4 The climatic–environmental meanings of $\delta^{18}\text{O}$ and $\delta^{13}\text{C}$ ratios**

There were many similarities between the  $\delta^{18}\text{O}$  and  $\delta^{13}\text{C}$  records of KY1, but there were also several important differences. Firstly, both  $\delta^{18}\text{O}$  and  $\delta^{13}\text{C}$  records showed obvious mutation phenomena, and most of the climatic fluctuations present in the  $\delta^{18}\text{O}$  records were also evident in the  $\delta^{13}\text{C}$  record. The

$\delta^{13}\text{C}$  records showed that changes in the proportions of C3- versus C4-plants, bio-productivity, and water-rock interactions occurred in AD 1482 (Fig. 6 A, B), which corresponded closely to the changes from strong to weak summer monsoon intensity and precipitation in AD 1482 shown in the  $\delta^{18}\text{O}$  records. This mutation involved changing from a low-value period to a high-value period, but the degree of fluctuation in the  $\delta^{13}\text{C}$  ratios was less than that in the  $\delta^{18}\text{O}$  records. The  $\delta^{13}\text{C}$  ratio curve was also more smooth (Fig. 6A, B). Furthermore, larger differences between the  $\delta^{13}\text{C}$  and the  $\delta^{18}\text{O}$  variations occurred later; the  $\delta^{18}\text{O}$  ratio reached its highest value in AD 1603 while the  $\delta^{13}\text{C}$  ratios did not reach its highest point until AD 1779, a delay of 176 years (Fig. 6A, B). On the other hand, both variation tendencies showed synchronization with each other before AD 1603. However, the  $\delta^{18}\text{O}$  ratios decreased from AD 1603, and reached the former level of AD 1482 before the mutation of AD 1746 and decreased unceasingly. The  $\delta^{18}\text{O}$  ratios had a short increasing stage since AD 1871 and reached the former mutation levels again in AD 1885, but the  $\delta^{13}\text{C}$  ratios variations were out of sync with the  $\delta^{18}\text{O}$  ratios and still much higher than the former level before AD 1482 until the stalagmite stopped growing of AD 1894.

The  $\delta^{18}\text{O}$  value of stalagmites in monsoonal areas like eastern China has been used as a proxy for the variability in the amount of rainfall because of the associated changes in the  $\delta^{18}\text{O}$  values with changing moisture sources and shifting rainy season (Yuan et al., 2004). Kaiyuan Cave is located in the warm temperate zone of the East Asia monsoon area. Rainfall is concentrated in the summer months, brought from the low latitudes of the Pacific by the summer monsoon. Thus, changes of the summer monsoon intensity and the amount of precipitation can affect the  $\delta^{18}\text{O}$  value of the stalagmite. We interpreted the  $\delta^{18}\text{O}$  record of KY1 in terms of the Asian summer monsoon intensity and precipitation, as presented by Cheng et al., (2009) and Zhang et al., (2008), respectively: lower and higher  $\delta^{18}\text{O}$  ratios correspond to stronger and weaker summer monsoons, and  $\delta^{18}\text{O}$  ratios correlate inversely with precipitation. Therefore, stronger summer monsoons with more precipitation occurred for 590 years between AD 892–1482, while a weaker summer monsoon with less precipitation occurred for 264 years between AD 1482–1746. A clear change in the summer monsoon intensity and precipitation occurred at AD 1482, corresponding to the transition between MWP and LIA, but lagging the solar radiation intensity by ~50 years (Fig. 6A). The summer monsoon intensity and precipitation decreased from AD 1483, reaching their minima AD 1603. After AD 1603, these values returned to AD 1482 levels, before the MWP/LIA transition in AD 1748. The summer monsoon intensity and precipitation showed obvious increases after AD 1746, but briefly decreased between AD 1871–1885.

The 1 ka growth period of KY1 covers several ancient Chinese historical periods, including the Tang Dynasty, the Five Dynasties and Ten Kingdoms period, the Northern and Southern Song Dynasty, and the Ming Dynasty before AD 1484, followed by the Ming and Qing Dynasties after AD 1484 (Fig. 6C). The trend of climatic change of the  $\delta^{18}\text{O}$  value differences reflected that the summer monsoon intensity showed roughly stronger/weaker alternating changes of the different dynasties above. In the context of these dynasties, the summer monsoon was weak at the end of the Tang Dynasty, then initially strong and later became weak during the Five Dynasties and Ten Kingdoms, then was stronger in the Northern Song Dynasty, weaker in Southern Dynasty, stronger in the Yuan Dynasty, weaker in the Ming Dynasty, and then initially strong followed by weaker and stronger periods in the Qing Dynasty. The transitions between the Tang Dynasty, Five Dynasties and Ten Kingdoms, Northern Song, Southern Song, Ming, Qing, and late Qing Dynasties all coincided with variations in the intensity of the summer monsoon intensity. Thus, the transitions between climate variations, rather than the climate or the variation themselves, were an important natural background in Chinese dynastic history. However, the transition from MWP to LIA was one of the biggest transition in the past 1 ka and occurred during the Ming Dynasty, but did not corresponding with a transition between dynasties. This exception may indicate that the fluctuating changes of the sub-climate variability were influenced by ancient Chinese social and historical evolution during MWP and LIA, which perhaps had a more prominent effect than climate transitions during MWP and LIA.

The variations of the surface vegetation-soil-groundwater system were reflected by the relative proportions of the C3- versus C4-plants, bio-productivity, and water-rock interaction, which are also related to both local climatic changes and anthropogenic activities. These activities include utilization of land on the mountain surrounding the cave, as the associated disafforestation, reclamation of cultivated land, and growth of crops affects the physical and chemical properties of the soil and changes the proportion of C3- versus C4-plants. The  $\delta^{13}\text{C}$  ratios were synchronized with the  $\delta^{18}\text{O}$  ratios from the late Tang Dynasty in AD 892 to the middle of the Yuan Dynasty in AD 1318 but fluctuated less than the  $\delta^{18}\text{O}$  ratios, which indicates that anthropogenic activities had a significant impact on the surface environment but did not change the composition, characteristics, or variation of the natural vegetation.

From AD 1318 to the mid-Ming Dynasty in AD 1479, the  $\delta^{13}\text{C}$  ratios varied as the opposite of the  $\delta^{18}\text{O}$  ratio; the  $\delta^{18}\text{O}$  and  $\delta^{13}\text{C}$  ratios tended to decrease and increase, respectively, in a series of small fluctuations. Thus, we infer that the impact of anthropogenic activities reached or exceeded those of

small climatic fluctuations, changing the natural surface vegetation composition, soil characteristics, and variation tendencies. While the  $\delta^{13}\text{C}$  ratio increased from AD 1483 to the mid-Qing Dynasty in AD 1779, the  $\delta^{18}\text{O}$  ratios consistently returned to AD 1483 levels after reaching peaks in AD 1498, 1603, and 1687. The  $\delta^{13}\text{C}$  curve only showed small fluctuations in response to the  $\delta^{18}\text{O}$  curve. During this period, the population increased rapidly, with consequent increases in the demand for firewood and the cultivation of sweet potato, peanut, and corn; the cultivated area of herbaceous plants continuously expanded. Kaiyuan Cave is in Shandong province, where the cultivated area increased from 54292938 mu in AD 1502 to 9934263 mu in AD 1753 (Liang, 1980) (Fig.6C). Since the plains and lower-lying areas had been completely developed and utilized, reclamation of mountainous areas provided the main sources of new land for cultivation. Crops became the main surface cover instead of the original shrubs and trees, leading to the intensity of the impact of anthropogenic activities on the vegetation and soil of the mountain reaching and exceeding those of the climate. The  $\delta^{13}\text{C}$  and  $\delta^{18}\text{O}$  ratios decreased between AD 1779–1894, except for a period of increase after AD 1885, because the cultivated land area and the land utilization were relatively stable over this period (98634511, 98472844, and 98472846 mu in AD 1812, 1851, and 1873, respectively) (Fig.6C). While the impact of anthropogenic activities on the vegetation-soil stabilized, the variation of the  $\delta^{13}\text{C}$  value remained prominent under the impact of the overall enhancement of the summer monsoon at the end of the LIA.

The drought/waterlog index cumulative departure curve (Chinese Academy of Meteorological Sciences of China Meteorological Administration, 1981; Wang et al., 2016),  $\delta^{18}\text{O}$  ratios, and  $\delta^{13}\text{C}$  ratios have the same variation tendencies (Fig. 6). In the cumulative departure curve, an increase corresponds to the changes associated with a drier environment and a declining trend corresponds to the changes associated with becoming waterlogged. The curve shows that precipitation decreased from AD 1480, which corresponds to the MWP to LIA transition period. At this time,  $\delta^{18}\text{O}$  ratios show a mutation from a low-value low-fluctuation period to a high-value high-fluctuation period, and the  $\delta^{13}\text{C}$  ratios change from a low-value period to a high-value period. The cumulative departure curve shows a period of lower precipitation from AD 1480–1744, which corresponds to the high-value high-fluctuation period in the  $\delta^{18}\text{O}$  ratios curve and indicates that, in the weaker summer monsoon period, the degree of fluctuation of the summer monsoon intensity increased and the precipitation decreased. The cumulative departure curve shows a lower precipitation period from AD 1480–1744 that coincides with a fast rise in the  $\delta^{13}\text{C}$  ratios; these effects may indicate that the crop yield of cultivated land decreased because of drought from the

low precipitation period. In response, humans may have been forced to expand the area of cultivated land by reclaiming wastelands (e.g. forested and mountainous areas) to obtain enough food to survive. This behavior results in higher proportions of C3- versus C4-plants and increased bio-productivity. Furthermore, a period of higher precipitation after ~AD 1744 corresponded to a reduction in the  $\delta^{13}\text{C}$  ratios. Thus, we conclude that anthropogenic activities affect the variation of  $\delta^{13}\text{C}$  ratios.

## 5 Conclusions

This study presents the first high-precision dating and high-resolution  $\delta^{18}\text{O}$  and  $\delta^{13}\text{C}$  records of the climatic-environmental changes in the Asian temperate coastal monsoon area over the past 1 ka, based on measurements of a stalagmite, KY1, from Kaiyuan Cave in the Shandong Peninsula. The results of the  $\text{U-}^{230}\text{Th}$  dating, continuous laminae counting, and measuring the  $\delta^{18}\text{O}$  ratios and  $\delta^{13}\text{C}$  ratios (average temporal resolution of ~3 yr) of the stalagmite KY1 showed a series of centennial to multi-centennial climate fluctuations including the MWP and LIA. The  $\delta^{18}\text{O}$  ratios of KY1 show that the Shandong Peninsula underwent a climate mutation in ~AD 1482, before which there was a strong summer monsoon and more precipitation than after AD 1482 (the weakest summer monsoon and the least precipitation appeared in AD 1609). In addition to the MWP to LIA climate transition, which occurred during the Ming dynasty, many other short-term secondary climate fluctuations have occurred in the past 1 ka, and these fluctuations synchronize with transitions between ruling dynasties.

According to the  $\delta^{13}\text{C}$  record of KY1, an abrupt change to the proportions of C3- versus C4-plants, bio-productivity, and water-rock interaction occurred in the area of Kaiyuan Cave occurred in AD 1482: higher proportions of C3- versus C4-plants, increased bio-productivity, and lower water-rock interaction all contributed to lower  $\delta^{13}\text{C}$  ratios before AD 1482; lower proportions of C3- versus C4-plants, decreased bio-productivity, and higher water-rock interaction all contributed to higher  $\delta^{13}\text{C}$  ratios after AD 1482. These factors reversed after AD 1482 and reached maxima in AD 1779 before decreasing again, though the levels of each factor at the end of KY1's growth period in AD 1894 remained higher than those of AD 1482. The variations of the  $\delta^{13}\text{C}$  ratios of KY1 were not synchronized with the  $\delta^{18}\text{O}$  ratios; both were composed of MWP and LIA, but the curve of the  $\delta^{13}\text{C}$  ratios was more smooth. The variations of the  $\delta^{13}\text{C}$  and  $\delta^{18}\text{O}$  ratios were out of sync in the LIA, and were more prominently unsynchronized later in the LIA. The lack of synchronization between the climatic changes and

environmental variations was indicated by the proportions of the C3- versus C4-plants, bio-productivity, and water-rock interaction variations shown by the  $\delta^{13}\text{C}$  record of KY1. The  $\delta^{13}\text{C}$  record was not only associated with the regional summer monsoon intensity and precipitation variation, but also with the intensity of human land utilization, which continuously increased in the mountainous area around the Kaiyuan cave from the end of Tang Dynasty to the end of Qing Dynasty. Anthropogenic activities increased especially rapidly in the 17<sup>th</sup> century, corresponding to the early Qing dynasty, such that the degree of impact of anthropogenic activities on the vegetation and soil around the cave exceeded that of the climate. This increase resulted in a reverse of the  $\delta^{13}\text{C}$  variation tendency of KY1 compared to the climate variation tendency shown by the  $\delta^{18}\text{O}$  ratios.

The temporal relationship between anthropogenic activities, the climate, and the environment coincides with the transition periods between the majority dynasties in Chinese history, and particularly the late Qing Dynasty. In the past 1 ka, these dynastic changes coincided with transitions between different summer monsoon stages. Therefore, the transitions of climatic variation tendency were an important natural background to the dynastic transitions of Chinese history. Furthermore, the impact of the trends in the fluctuations of climatic variation tendency in the MWP and LIA on the historical evolution of human society was shown to be more prominent than the MWP to LIA climate transition itself. On the other hand, the degree of impact degree of human land utilization on the mountain vegetation composition, soil characteristics, and the trends in their changes were less significant than climate change from AD 892 to AD 1318, but the effects of human land utilization reached or exceeded those of small climate changes from AD 1318 to AD 1497. These effects significantly exceeded climate change between AD 1483–1779, but the impact of human land utilization and the environment tended to be stable from AD 1779–1894. Thus, the impacts of climate change on the environment were relatively prominent.

## **Acknowledgement**

This research was funded by the National Natural Science Foundation of China (NNSFC, NO. 41171158). The authors thank Dr. Shen Chuan-Chou(National Taiwan University) and Jiang Xiuyang (Fujian Normal University) for his help in high-precision dating with the U–Th techniques, and thank Houyun Zhou (South China Normal University) in sample collection and analysis.

## References

- Baker, A., Ito, E., Smart, P., McEwan, R.F.: Elevated and variable values of  $^{13}\text{C}$  in speleothems in a British cave system, *Chem. Geol.*, 136, 263-270, 1997.
- Baker, A., Wilson, R., Fairchild, I. J., Franke, J., Spötl, C., Matthey, D., Trouet, V., Fulle, L.: High resolution  $\delta^{18}\text{O}$  and  $\delta^{13}\text{C}$  records from an annually laminated Scottish stalagmite and relationship with last millennium climate. *Global Planet. Change*, 79, 303-311, 2011.
- Banner, J. L., Musgrove, M., Asmerom, Y., Edwards, R. L., Hoff, J. A.: High-resolution temporal record of Holocene ground-water chemistry: Tracing links between climate and hydrology. *Geology*, 24, 1049-1053, 1996.
- Broecker, W.S.: Was the medieval warm period global? *Science*, 291, 1497-1499, 2001.
- Burns, S.J., Fleitmann, D., Matter, A., Kramers, J., Al-Subbary A. A.: Indian ocean climate and an absolute chronology over Dansgaard/Oeschger events 9 to 13. *Science*, 301, 1365-1367, 2003.
- Chen, J. Y.: Advances in the Ordovician stratigraphy of North China with a brief description of nautiloid fossils. *Acta Palaeontologica Sinica*, 1, 59, 1976. (In Chinese with English abstract)
- Cheng, H., Edwards, R. L., Broecker, W. S., Denton, G. H., Kong, X. G., Wang, Y. J., Zhang, R., Wang, X. F.: Ice age terminations. *Science*, 326, 248-252, 2009.
- Cheng, H., Edwards, R. L., Shen, C. C., Polyak, V. J., Asmerom, Y., Woodhead, J., Hellstrom, J., Wang, Y. J., Kong, X. G., Spötl, C., Wang, X. F., and Alexander Jr, E. C.: Improvements in  $^{230}\text{Th}$  dating,  $^{230}\text{Th}$  and  $^{234}\text{U}$  half-life values, and U-Th isotopic measurements by multi-collector inductively coupled plasma mass spectrometry. *Earth Planet. Sc. Lett.*, 371-372, 82-91, 2013.
- Chinese Academy of meteorological sciences of China Meteorological Administration: Yearly charts of dryness/wetness in China for the last 500-year period. Beijing, China, China Cartographic Publishing House, 1981. (In Chinese)
- Dorale, J. A., Edwards R. L., Ito, E., González, L. A.: Climate and vegetation history of the midcontinent from 75 to 25 ka: a speleothem record from Crevice Cave, Missouri, USA. *Science*, 282, 1871-1874, 1998.
- Dykoski, C. A., Edwards, R. L., Cheng, H., Yuan, D. X., Cai, Y. J., Zhang, M. L., Lin, Y. S., Qing, J. M., An, Z. S., Revenaugh, J.: A high-resolution, absolute-dated Holocene and deglacial Asian monsoon record from Dongge Cave, China. *Earth Planet. Sc. Lett.*, 233, 71-86, 2005.
- Fagan, B.: *Floods, Famines and Emperors*. Basic Books, New York, 1999.
- Fleitmann, D., Burns, S. J., Mudelsee, M., Neff, U., Kramers, J., Mangini, A., Matter, A.: Holocene Forcing of the Indian Monsoon Recorded in a Stalagmite from Southern Oman. *Science*, 300, 1737-1739, 2003.

- Genty, D., Blamart, D., Ouahdi, R., Gilmour, M., Baker, A., Jouzel, J., Van-Exter, S.: Precise dating of Dansgaard-Oeschger climate oscillations in Western Europe from stalagmite data. *Nature*, 421, 833-837, 2003.
- Hendy, C. H.: The isotopic geochemistry of speleothems (Part I). The calculation of the effects of different modes of formation on the isotopic composition of speleothems and their applicability as palaeoclimatic indicators. *Geochim. Cosmochim. Ac.*, 35, 801-824, 1971.
- Hiess, J., Condon, D. J., McLean, N., Noble, S. R.:  $^{238}\text{U}/^{235}\text{U}$  Systematics in Terrestrial Uranium-Bearing Minerals. *Science*, 30, 1610-1614, 2012.
- Holmgren, K., Karlén, W., Shaw, P. A.: Paleoclimatic Significance of the Stable Isotopic Composition and Petrology of a Late Pleistocene Stalagmite from Botswana. *Quat. Res.*, 43, 320-328, 1995.
- Hou, J. Z., Tan, M., Cheng, H., Liu T. S.: Stable isotope records of plant cover change and monsoon variation in the past 2200 years: evidence from laminated stalagmites in Beijing, China. *Boreas*, 32, 304-313, 2003.
- Hu, C. Y., Henderson, G. M., Huang, J. H., Xie, S. C., Sun, Y., Johnson, K. R.: Quantification of Holocene Asian monsoon rainfall from spatially separated cave records. *Earth Planet. Sc. Lett.*, 266, 221-232, 2008.
- Jaffey, A. H. K., Flynn, K. F., Glendenin, L. E., Bentley, W. C., Essling, A. M.: Precision measurement of half-lives and specific activities of  $^{235}\text{U}$  and  $^{238}\text{U}$ . *Phys. Rev. C.*, 4, 1889-1906, 1971.
- Jamieson, R. A., Baldini, J. U. L., Brett, M. J., Taylor, J., Ridley, H. E., Ottley, C. J., Prufer, K. M., Wassenburg, J., Scholz, D., Breitenbach, S. F. M.: Intra- and inter-annual uranium concentration variability in a Belizean stalagmite controlled by prior aragonite precipitation: A new tool for reconstructing hydro-climate using aragonitic speleothems. *Geochim. Cosmochim. Ac.* 190, 332-346, 2016.
- Johnson, K. R., Ingram B. L., Sharp W. D., Zhang P. Z.: East Asian summer monsoon variability during Marine Isotope Stage 5 based on speleothem  $\delta^{18}\text{O}$  records from Wanxiang Cave, central China. *Palaeogeography, Palaeoclimatology, Palaeoecology* 236, 5-19, 2006.
- Lamb, H. H.: The early medieval warm epoch and its sequel. *Palaeogeogr. Palaeoclimatol.*, 1, 13-37, 1965.
- Lechleitner, F. A., Baldini, J. U. L., Breitenbach, S. F. M., Fohlmeister, J., McIntyre, C., Goswami, B., Jamieson, R. A., Voort, T. S., Prufer, K., Marwan, N., Culleton, B. J., Kennett, D. J., Asmerom, Y., Polyak, V., Eglinton, T. I.: Hydrological and climatological controls on radiocarbon concentrations in a tropical stalagmite. *Geochim. Cosmochim. Ac.* 194, 233-252, 2016.
- Liang, F. Z.: The household registration, cultivated land and land tax statistics of the past dynasties in China. People's Publishing House, 282-428, 1980. (In Chinese)



- Li, H. C., Lee, Z. H., Wan, N. J., Shen, C. C., Li, T. Y., Yuan, D. X., Chen, Y. H.: The  $\delta^{18}\text{O}$  and  $\delta^{13}\text{C}$  records in an aragonite stalagmite from Furong Cave, Chongqing, China: A-2000-year record of monsoonal climate. *J. Asian Earth Sci.*, 40, 1121–1130, 2011.
- Li, X. L., Wang, C. F., Huang, J. H., Hu, C. Y., Xie, S. C.: Seasonal variation of fatty acids from drip water in Heshang Cave, central China. *Appl. Geochem.*, 26, 341–347, 2011.
- Liu, J. B., Chen, J. H., Zhang, X. J., Li, Y., Rao, Z. G., Chen, F. H.: Holocene East Asian summer monsoon records in northern China and their inconsistency with Chinese stalagmite  $\delta^{18}\text{O}$  records. *Earth-Sci. Rev.*, 148, 194–208, 2015.
- Mangini, A., Spöhl, C., Verdes, P.: Reconstruction of temperature in the Central Alps during the past 2000 yr from a  $\delta^{18}\text{O}$  stalagmite record. *Earth Planet. Sc. Lett.*, 235, 741–751, 2005.
- Matthews, J. A., Briffa, K. R.: The "Little Ice Age": Re-evaluation of an evolving concept. *Geografiska Annaler: Series A, Phys. Geogr.*, 87, 17–36, 2005.
- McDermott, F., Mathey, D. P., Hawkesworth, C.: Centennial-scale Holocene climate variability revealed by a high-resolution speleothem  $\delta^{18}\text{O}$  record from SW Ireland. *Science*, 294, 1328–1331, 2001.
- National Research Council: Surface temperature reconstructions for the last 2000 years. National Academies Press, Washington, D.C., 2006.
- Ogilvie, A. E. J., Jónsson T., 2001. "Little Ice Age" research: A perspective from Iceland. *Climate Change* 48, 9–52.
- Paulsen, D. E., Li, H.-C., Ku, T.-L.: Climate variability in central China over the last 1270 years revealed by high-resolution stalagmite records. *Quat. Sci. Rev.*, 22, 691–701, 2003.
- Shandong Provincial Bureau of Geology&Mineral: The Regional Geology Records. Beijing, China, Geological Publishing House, 1991. (In Chinese)
- Shen, C. C., Edwards, R. L., Cheng, H., Dorale, J. A., Thomas, R. B., Moran, S. B., Weinstein, S. E., Edmonds, H. N.: Uranium and thorium isotopic and concentration measurements by magnetic sector inductively coupled plasma mass spectrometry. *Chem. Geol.*, 185, 165–178, 2002.
- Shen, C. C., Cheng, H., Edwards, R. L., Moran, S. B., Edmonds, H. N., Hoff, J. A., Thomas, R. B.: Measurement of attogram quantities of  $^{231}\text{Pa}$  in dissolved and particulate fractions of seawater by isotope dilution thermal ionization mass spectroscopy. *Anal. Chem.*, 75, 1075–1079, 2003.
- Shen, C. C., Wu, C. C., Cheng, H., Edwards, R. L., Hsieh Y. T., Gallet, S., Chang, C. C., Li, T. Y., Lam, D. D., Kano, A., Hori M., and Spöhl, C.: High-precision and high resolution carbonate  $^{230}\text{Th}$  dating by MC-ICP-MS with SEM protocols. *Geochim. Cosmochim. Ac.*, 99, 71–86, 2012.
- Tan, L. C., Cai, Y. J., Cheng, H., An, Z. S., Edwards R. L.: Summer monsoon precipitation variations in central China over the past 750 years derived from a high-resolution absolute-dated stalagmite. *Palaeogeogr. Palaeoclimatol.* 280, 432–439, 2009.

- Tan, M.: Climatic differences and similarities between Indian and East Asian Monsoon regions of China over the last millennium: a perspective based mainly on stalagmite records. *International Journal of Speleology* 36, 75-81, 2007.
- Tan, M., Liu T. S., Hou, J. Z., Qin, X. G., Zhang, H. C., Li, T. Y.: Cyclic rapid warming on centennial-scale revealed by a 2650-year stalagmite record of warm season temperature. *Geophys. Res. Lett.*, 30, DOI: 10.1029/2003GL017352, 2003.
- The soil and fertilizer workstation of Shandong Province: Shandong Soil. Beijing, China, China Agriculture Press. (In Chinese), 1994.
- Wang, Q., Zhou, H. Y., Cheng, K., Chi, H., Shen, C. -C., Wang, C. S., Ma, Q. Q.: The climate reconstruction in Shandong Peninsula, northern China, during the last millennium based on stalagmite laminae together with a comparison to  $\delta^{18}\text{O}$ , *Clim. Past*, 12, 871-881, 2016.
- Wang, Y. J., Cheng, H., Edwards, R. L., An, Z. S., Wu, J. Y., Shen, C.-C., Dorale, J. A.: A high-resolution absolute-dated late Pleistocene monsoon record from Hulu Cave, China. *Science*, 294, 2345-2348, 2001.
- Wang, Y. J., Cheng, H., Edwards, R. L., He, Y. Q., Kong, X. G., An, Z. S., Wu, J. Y., Kelly, M. J., Dykoski, C. A., Li, X. D.: The Holocene Asian Monsoon: Links to Solar Changes and North Atlantic Climate. *Science*, 308, 854-857, 2005.
- Wang, Y. J., Cheng, H., Edwards, R. L., Kong, X. G., Shao, X. H., Chen, S. T., Wu, J. Y., Jiang, X. Y., Wang, X. F., An, Z. S.: Millennial- and orbital-scale changes in the East Asian monsoon over the past 224000 years. *Nature*, 451, 1090-1093, 2008.
- Yang, Q. C., Scholz, D., Jochum K. P., Hoffmann D. L., Stoll B., Weis U., Schwager B., Andrea M. O.: Lead isotope variability in speleothems—A promising new proxy for hydrological change? First results from a stalagmite from western Germany. *Chem. Geol.*, 396, 143-151, 2015.
- Yuan, D. X., Cheng, H., Edwards, R. L., Dykoski, C.A., Kelly, M. J., Zhang, M. L., Qing, J. M., Lin, Y. S., Wang, Y. J., Wu, J. Y., Dorale, J. A., An, Z. S., Cai, Y. J.: Timing, Duration, and Transitions of the Last Interglacial Asian Monsoon. *Science*, 304, 575-578, 2004.
- Zhang, P. Z., Cheng, H., Edwards, R. L., Chen, F. H., Wang, Y. J., Yang, X. L., Liu, J., Tan, M., Wang, X. F., Liu, J. H., An, C. L., Dai, Z. B., Zhou, J., Zhang, D. Z., Jia, J.H., Jin, L. Y., Johnson, K. R.: A test of climate, sun, and culture relationships from an 1810-Year Chinese Cave record. *Science*, 322, 940-942, 2008.
- Zhou, H. Y., Wang, Q., Cai, B. G.: Typical Northern Type Speleothem Micro-Layers Found in Stalagmite KY1 collected from Kaiyuan Cave in Shandong Province, Northern China. *Quat. Sci.*, 30, 441-442. (In Chinese with English abstract), 2010.



## Figures

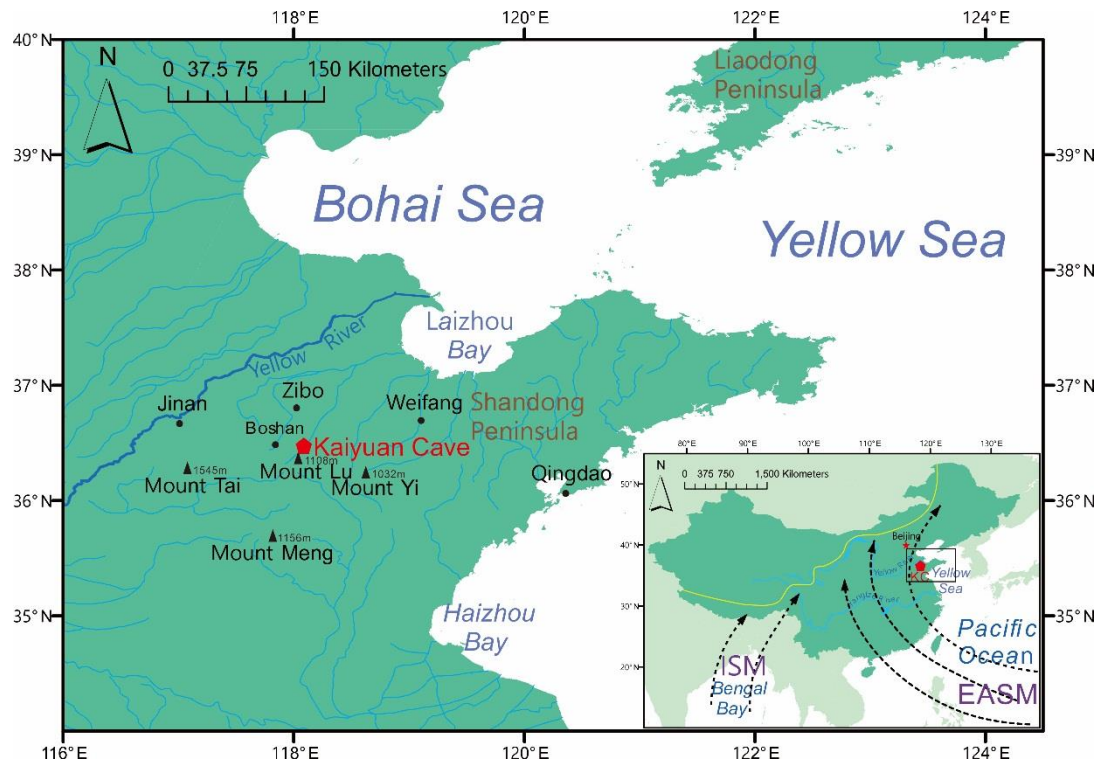

**Figure 1** Location of Kaiyuan Cave and Shandong peninsula in monsoonal China. KC: Kaiyuan Cave ( $36^{\circ}24'32''\text{N}$ ,  $118^{\circ}02'05''\text{E}$ ). The thick blue line is the Yellow River, and the thin blue lines are other rivers in this area. In the bottom-right inset, the yellow line indicates the northwestern boundary of the Asian summer monsoon. The dashed black lines with arrows indicate the routes of the summer monsoon. EASM: East Asia Summer Monsoon. ISM: Indian Summer Monsoon.

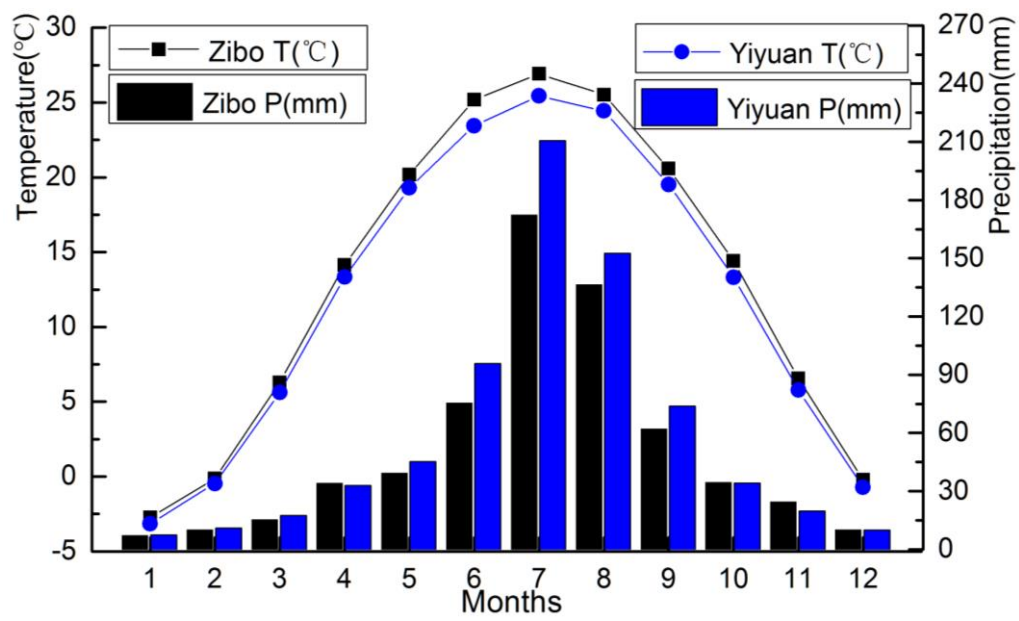

**Figure 2** Monthly mean temperature (T) and precipitation (P) at Zibo Station (1956-1994) and Yiyuan Station (1958-2005), the two meteorological stations close to the study site.

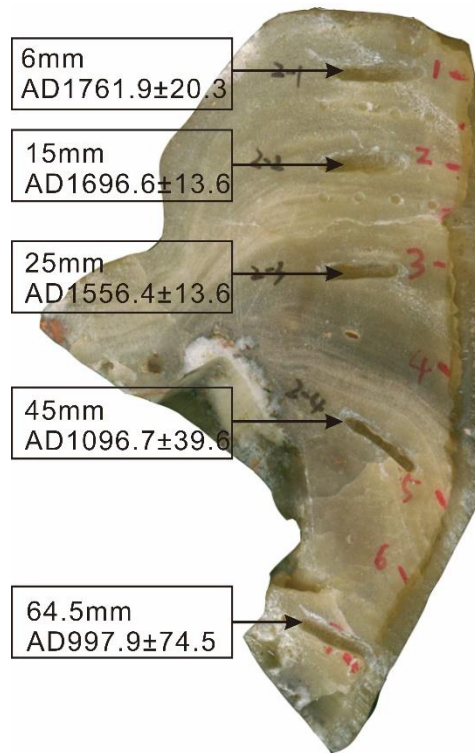

**Figure 3** The sampling positions used for U-<sup>230</sup>Th dating in stalagmite KY1.

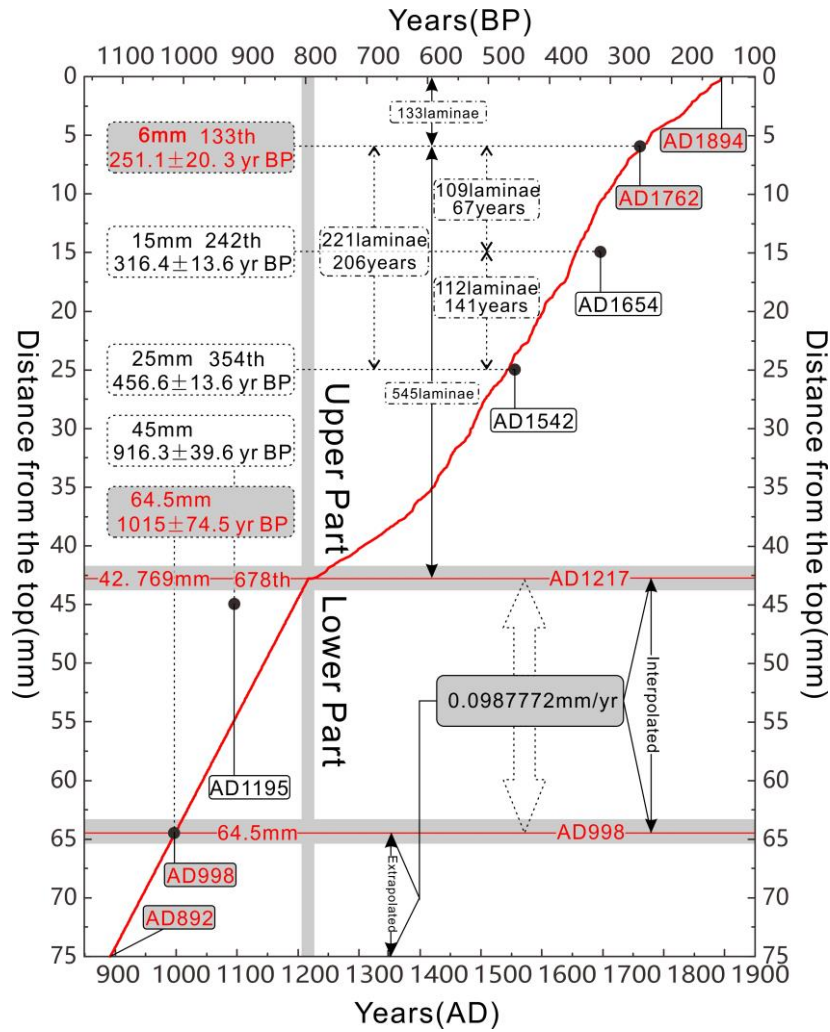

**Figure 4** Age model for stalagmite KY1 established by a combination of laminae counting and linear interpolation/extrapolation based on the average growth rate at dated points. The black points indicate dated points based on high precision dating results using U-<sup>230</sup>Th dating. The red line represents the time scale of KY1. The upper part (0–42.769 mm) of stalagmite KY1 was calculated by the horizon of 6 mm (133rd laminae) by continuous laminae counting upwards and downwards. The lower part (42.769–75 mm) of stalagmite KY1 was calculated from the age of the 42.769 mm (AD 1217) and 64.5 mm (AD 998) samples based on linear interpolation (42.769–64.5 mm) or extrapolation (64.5–75 mm) of the average deposition rate (0.0987772 mm yr<sup>-1</sup>). “BP (before present),” “present” in this table refers to AD 2013.

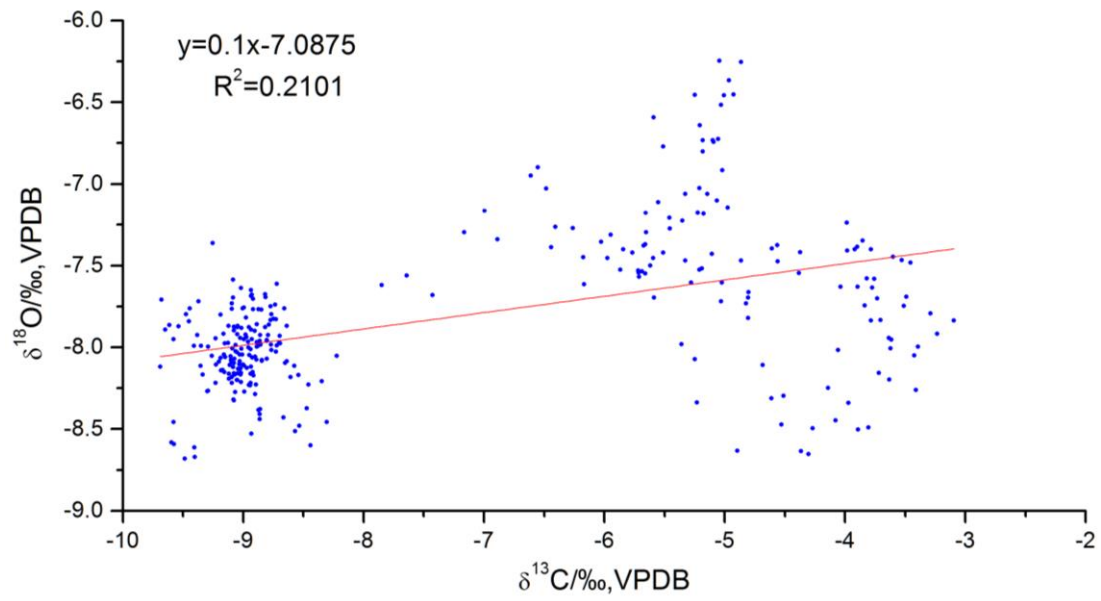

**Figure 5** Correlation between  $\delta^{18}\text{O}$  and  $\delta^{13}\text{C}$  values in the stalagmite KY1, which indicate that the calcite in KY1 was deposited under isotopic equilibrium conditions.



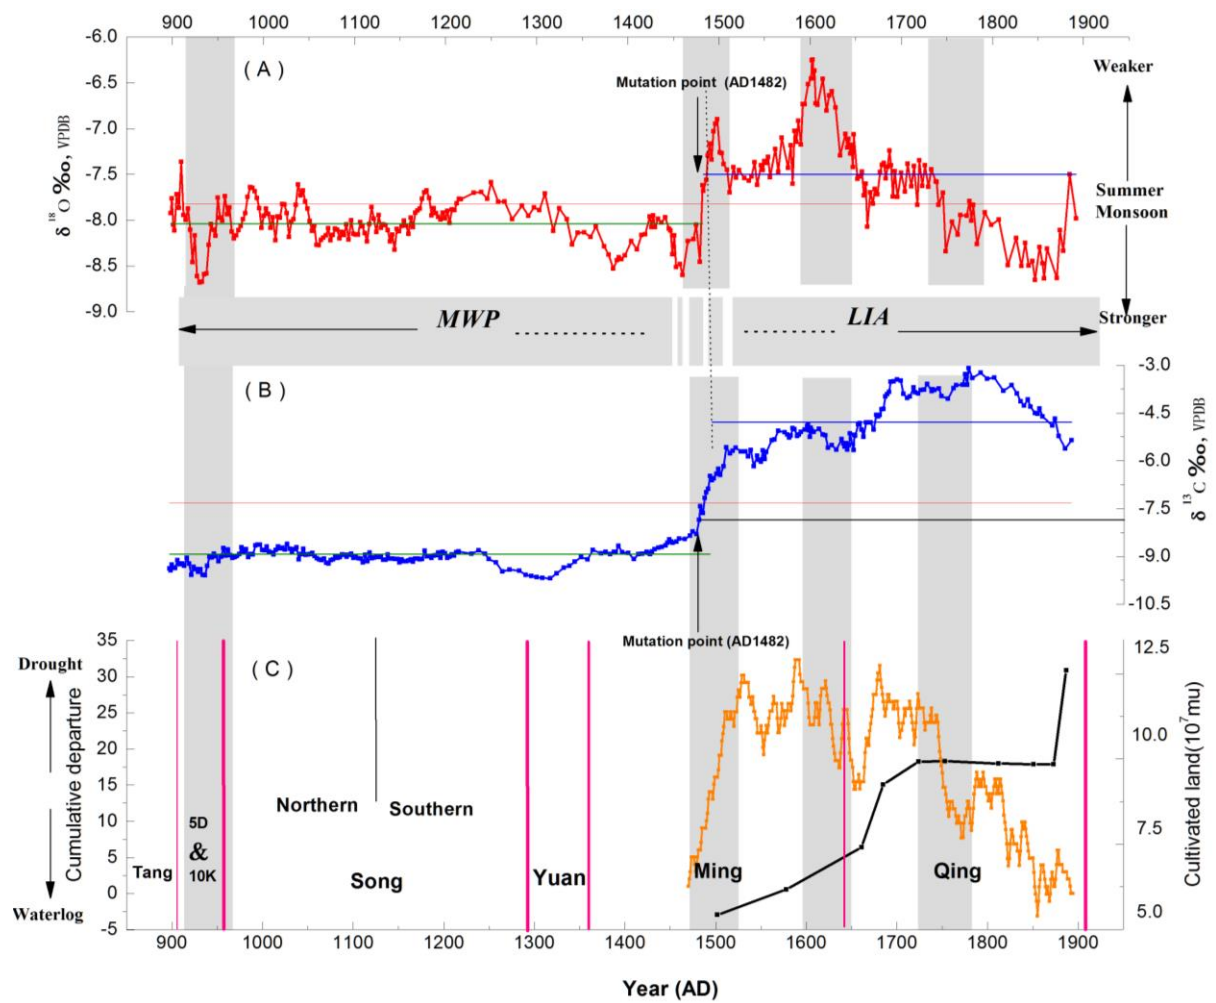

**Figure 6** Comparison of the  $\delta^{18}\text{O}$  and  $\delta^{13}\text{C}$  records of KY1 from Kaiyuan cave in the Shandong peninsula and the cultivated land area of Shandong province from AD 1500 to AD 1890. The gray bands indicate the mutation points of the  $\delta^{18}\text{O}$  and  $\delta^{13}\text{C}$  values. (A) The  $\delta^{18}\text{O}$  value time series of KY1, including the MWP and LIA, in which the arrow indicates that the transition from the MWP to LIA at AD 1482. The maximum  $\delta^{18}\text{O}$  value of  $-6.247\text{‰}$  appeared in AD 1603 and the minimum of  $-8.682\text{‰}$  in AD 930. (B) The  $\delta^{13}\text{C}$  value time series, with a mutation point at AD 1482, maximum value of  $-3.095\text{‰}$  at AD 1779, and the minimum value of  $-9.691\text{‰}$  at AD 1318. (C) The black line shows the area of cultivated land in the Shandong province from AD 1500–1890; the orange line is the cumulative departure curve of drought/waterlog index. In the figure, ancient Chinese dynasties are indicated with 5D & 10K standing for the Five Dynasties and Ten Kingdoms period.

## Tables

**Table 1 U-series isotopic results and ages for stalagmite KY1 from Kaiyuan Cave, Shandong Peninsula, Northern China (Wang et al., 2016).**

| Sample ID                                                             | 1              | 2              | 3              | 4              | 5              |
|-----------------------------------------------------------------------|----------------|----------------|----------------|----------------|----------------|
| Distance from top (mm)                                                | 6.0            | 15.0           | 25.0           | 45             | 64.5           |
| $^{238}\text{U}$ ppb <sup>a</sup>                                     | 347.47± 0.63   | 434.45± 0.92   | 334.58± 0.61   | 374.63± 0.73   | 379.91± 0.61   |
| $^{232}\text{Th}$ ppt                                                 | 1245.2± 5.0    | 959.9± 4.9     | 704.6± 5.1     | 2514.6± 9.3    | 5147.0± 19.0   |
| $\delta^{234}\text{U}_{\text{measure}}$<br>d                          | 1457.9± 5.5    | 1341.2± 5.1    | 1320.3± 4.6    | 1468.7± 5.1    | 1522.8± 4.9    |
| $[\text{}^{230}\text{Th}/\text{}^{238}\text{U}]$                      | 0.00652±0.0001 | 0.00732±0.0001 | 0.01021±0.0001 | 0.02229±0.0003 | 0.02665±0.0005 |
| activity <sup>c</sup>                                                 | 4              | 1              | 3              | 7              | 1              |
| $[\text{}^{230}\text{Th}/\text{}^{232}\text{Th}]$<br>ppm <sup>d</sup> | 30.0± 0.68     | 54.63± 0.89    | 79.9± 1.2      | 54.75± 0.94    | 32.42± 0.63    |
| Age<br>uncorrected                                                    | 289.6± 6.5     | 341.4± 5.4     | 480.6± 6.3     | 988.2± 16.8    | 1157.1± 22.5   |
| BP                                                                    |                |                |                |                |                |
| Age<br>corrected <sup>c,e</sup>                                       | 251.1± 20.3    | 316.4± 13.6    | 456.6± 13.6    | 916.3± 39.6    | 1015.1± 74.5   |
| BP                                                                    |                |                |                |                |                |
| Age<br>corrected <sup>c,e</sup>                                       | 1761.9±20.3    | 1696.6±13.6    | 1556.4±13.6    | 1096.7±39.6    | 997.9±74.5     |
| AD                                                                    |                |                |                |                |                |
| $\delta^{234}\text{U}_{\text{initial}}$                               |                |                |                |                |                |
| corrected <sup>b</sup>                                                | 1458.9± 5.5    | 1342.4± 5.1    | 1322.1± 4.6    | 1472.5± 5.2    | 1527.2± 4.9    |
| BP                                                                    |                |                |                |                |                |

Chemistry was performed on July 8, 2013 with the analysis method of Shen et al., (2003), and instrumental analysis on Multi Collector Inductively Coupled Plasma Mass Spectrometer (MC-ICP-MS) (Shen et al., 2012). Analytical errors are 2 $\sigma$  of the mean. “BP (before present),” “present” in this table refers to AD 2013.

<sup>a</sup> $[\text{}^{238}\text{U}] = [\text{}^{235}\text{U}] \times 137.818 (\pm 0.65\%)$  (Hiess et al., 2012);  $\delta^{234}\text{U} = ([\text{}^{234}\text{U}/\text{}^{238}\text{U}]_{\text{activity}} - 1) \times 1000$ .

<sup>b</sup> $\delta^{234}\text{U}_{\text{initial}}$  corrected was calculated based on  $^{230}\text{Th}$  age (T), i.e.,  $\delta^{234}\text{U}_{\text{initial}} = \delta^{234}\text{U}_{\text{measured}} \times e^{\lambda^{234} \times T}$ , and T is corrected age.

<sup>c</sup> $[^{230}\text{Th}/^{238}\text{U}]_{\text{activity}} = 1 - e^{-\lambda_{230}T} + (\delta^{234}\text{U}_{\text{measured}}/1000)[\lambda_{230}/(\lambda_{230} - \lambda_{234})](1 - e^{-(\lambda_{230} - \lambda_{234})T})$ , where  $T$  is the age. Decay constants are  $9.1705 \times 10^{-6} \text{ yr}^{-1}$  for  $^{230}\text{Th}$ ,  $2.8221 \times 10^{-6} \text{ yr}^{-1}$  for  $^{234}\text{U}$  (Cheng et al., 2013), and  $1.55125 \times 10^{-10} \text{ yr}^{-1}$  for  $^{238}\text{U}$  (Jaffey et al., 1971).

<sup>d</sup>The degree of detrital  $^{230}\text{Th}$  contamination is indicated by the  $[^{230}\text{Th}/^{232}\text{Th}]$  atomic ratio instead of the activity ratio.

<sup>e</sup>Age corrections for samples were calculated using an estimated atomic  $^{230}\text{Th}/^{232}\text{Th}$  ratio of  $4 \pm 2$  ppm. Those are the values for a material at secular equilibrium, with the crustal  $^{232}\text{Th}/^{238}\text{U}$  value of 3.8. The errors are arbitrarily assumed to be 50%.

**Table 2** The results of the Hendy tests conducted along two growth laminae of KY1 at depths of 9.5 mm and 18.5 mm individually, which indicate that calcite in KY1 was deposited under isotopic equilibrium conditions according to the Hendy Test rules (Hendy, 1971; Wang et al., 2016).

| Sample number | Distance from the<br>top/mm | Distance from the center of<br>growth/mm | $\delta^{13}\text{C}_{\text{‰}}$ | $\delta^{18}\text{O}_{\text{‰}}$ |
|---------------|-----------------------------|------------------------------------------|----------------------------------|----------------------------------|
| KY1-9/10-5    | 9.5                         | 5.0                                      | -3.368‰                          | -7.506‰                          |
| KY1-9/10-10   |                             | 10.0                                     | -4.125‰                          | -7.753‰                          |
| KY1-9/10-15   |                             | 15.0                                     | -4.096‰                          | -7.981‰                          |
| KY1-9/10-20   |                             | 20.0                                     | -3.975‰                          | -7.691‰                          |
| KY1-18/19-5   | 18.5                        | 5.0                                      | -5.138‰                          | -6.571‰                          |
| KY1-18/19-10  |                             | 10.0                                     | -5.301‰                          | -6.671‰                          |
| KY1-18/19-15  |                             | 15.0                                     | -5.260‰                          | -6.540‰                          |
| KY1-18/19-20  |                             | 20.0                                     | -5.229‰                          | -6.542‰                          |
