# Supplementary figures and images for: Relationship between climate, environment, and anthropogenic activities in coastal North China recorded by speleothem δ&lt;sup&gt;18&lt;/sup&gt;O and δ&lt;sup&gt;13&lt;/sup&gt;C ratios in the last 1 ka
Source: Copernicus journal article supplement (doi:10.5194/cp-2017-73), 2017-07-20

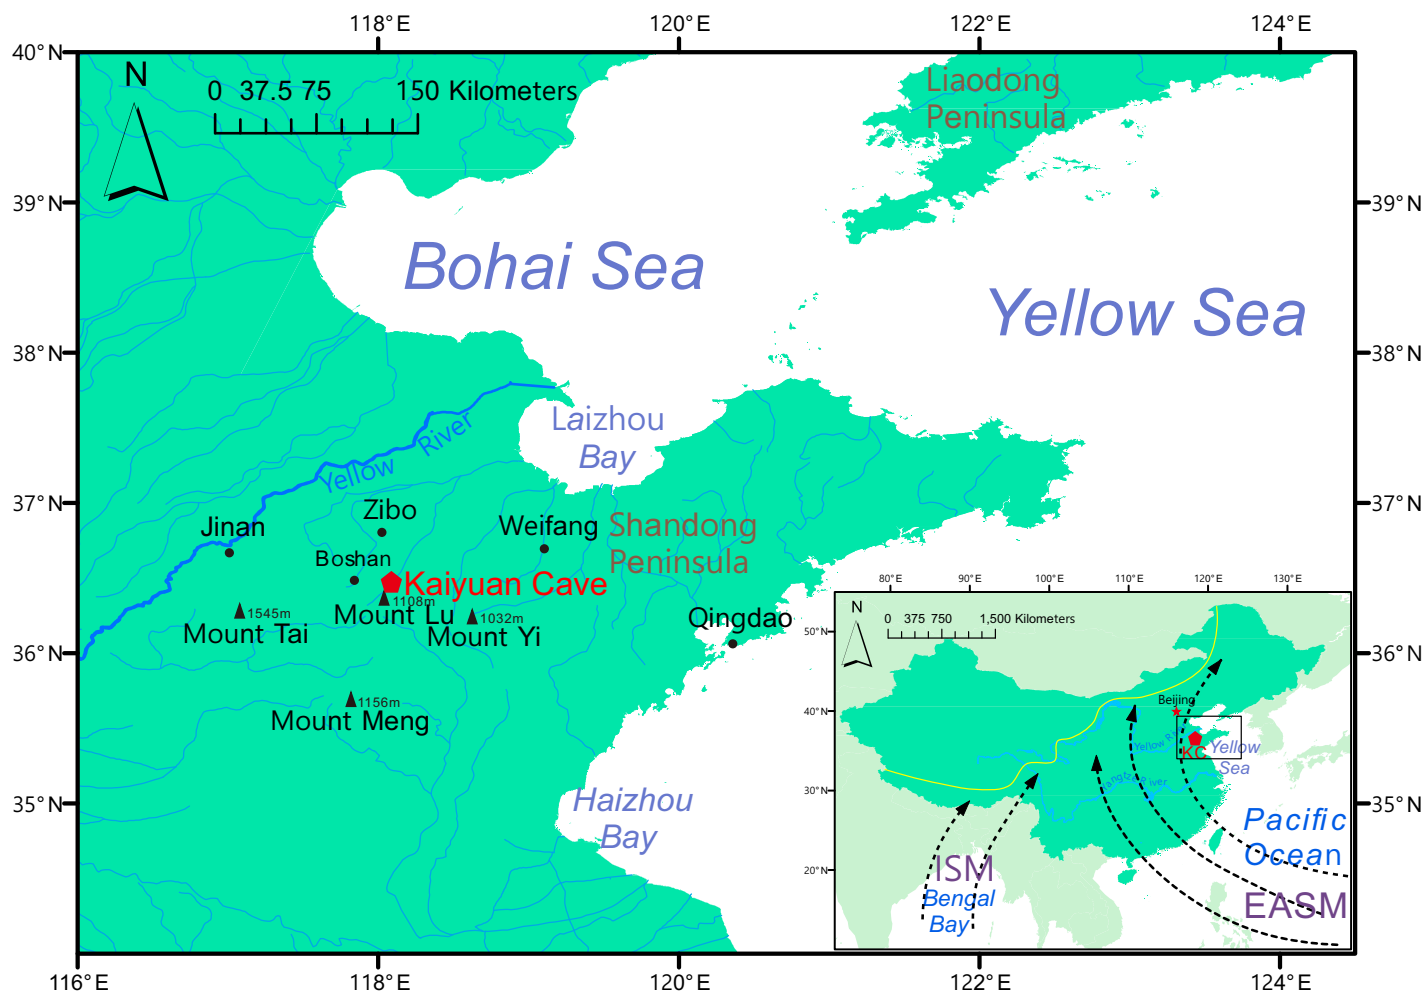

Supplement: Supplementary file 1 [file cp-2017-73-supplement.zip]

Year(AD)

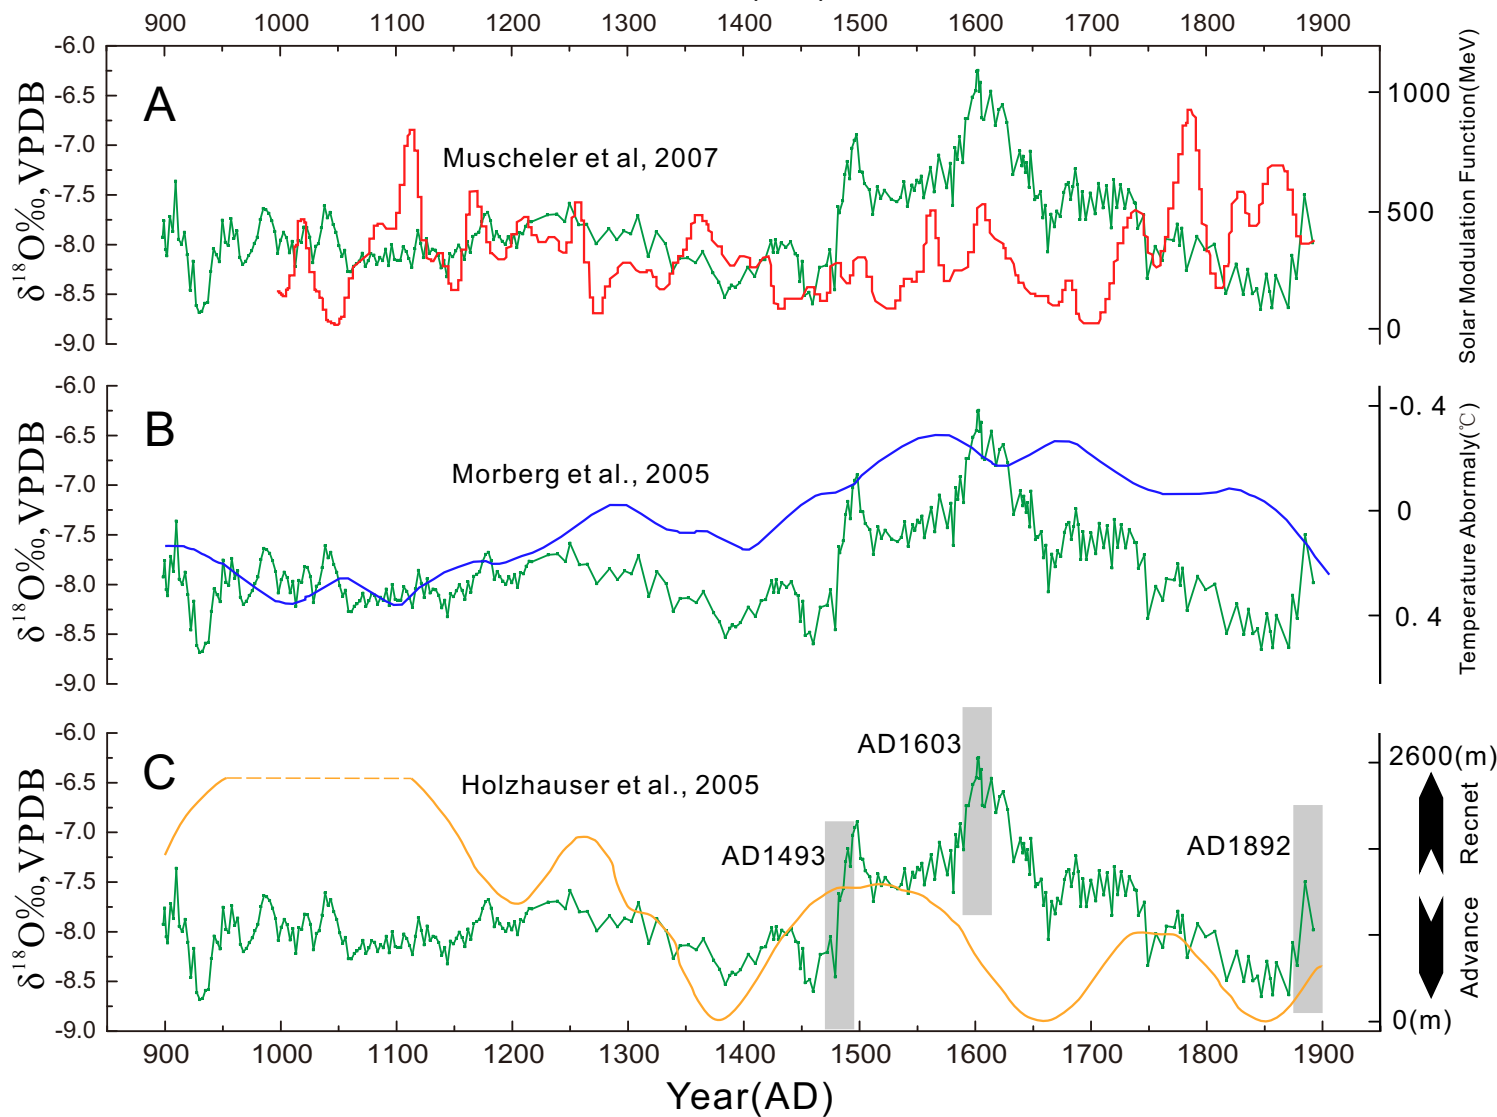

Supplement: Supplementary file 2 [file cp-2017-73-supplement.zip]

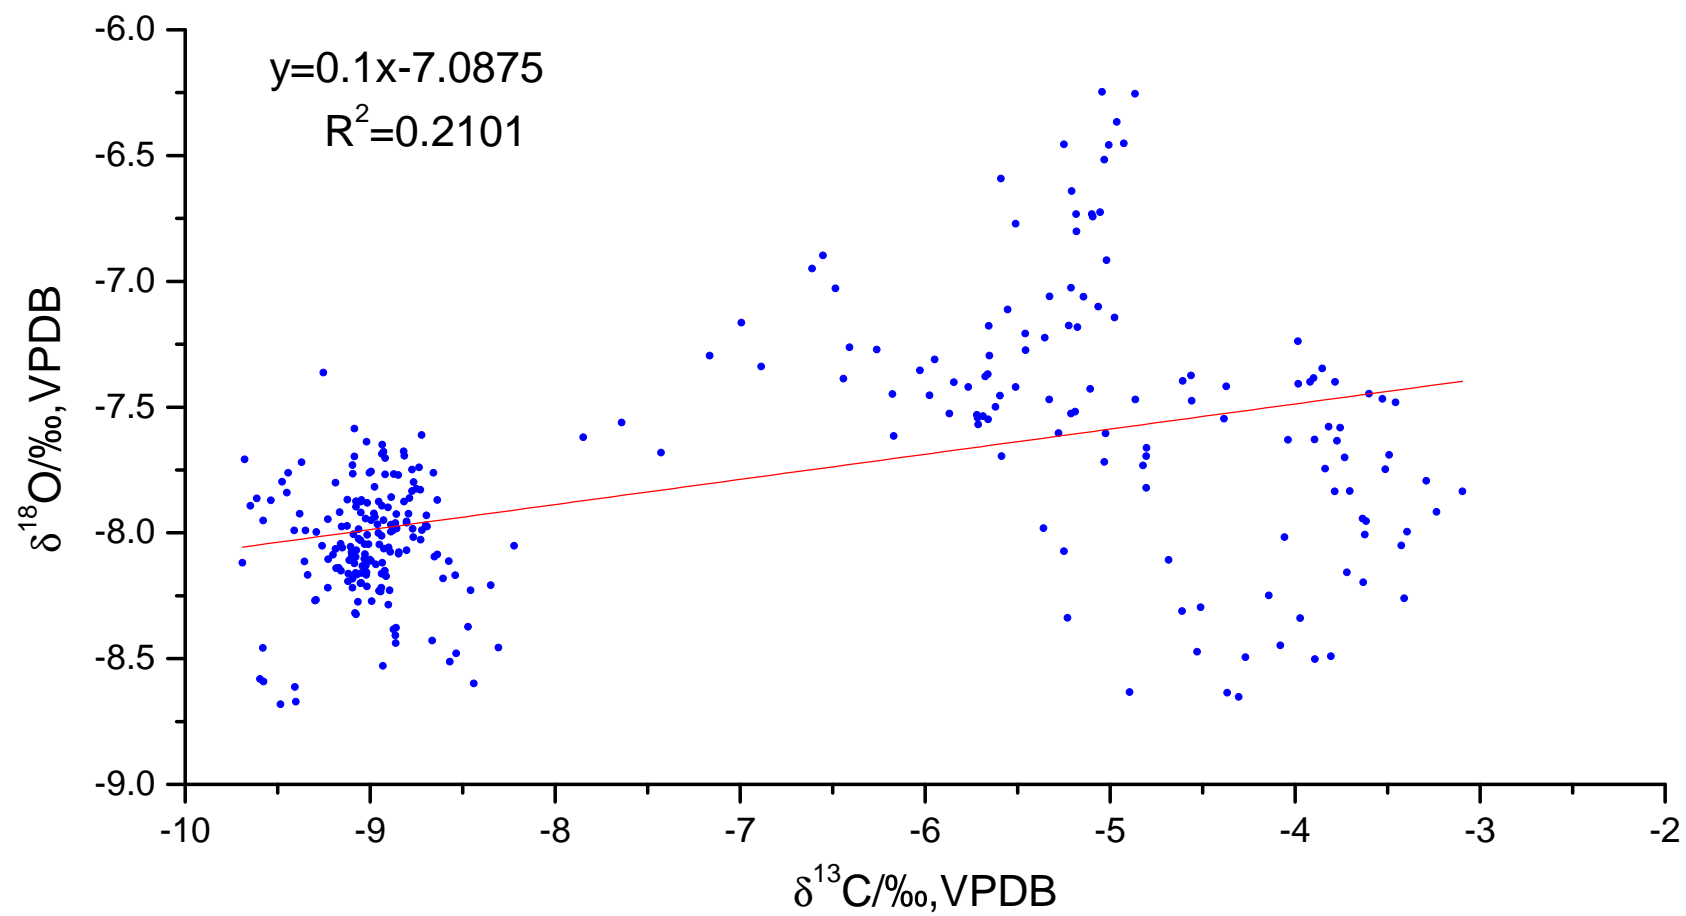

Supplement: Supplementary file 3 [file cp-2017-73-supplement.zip]

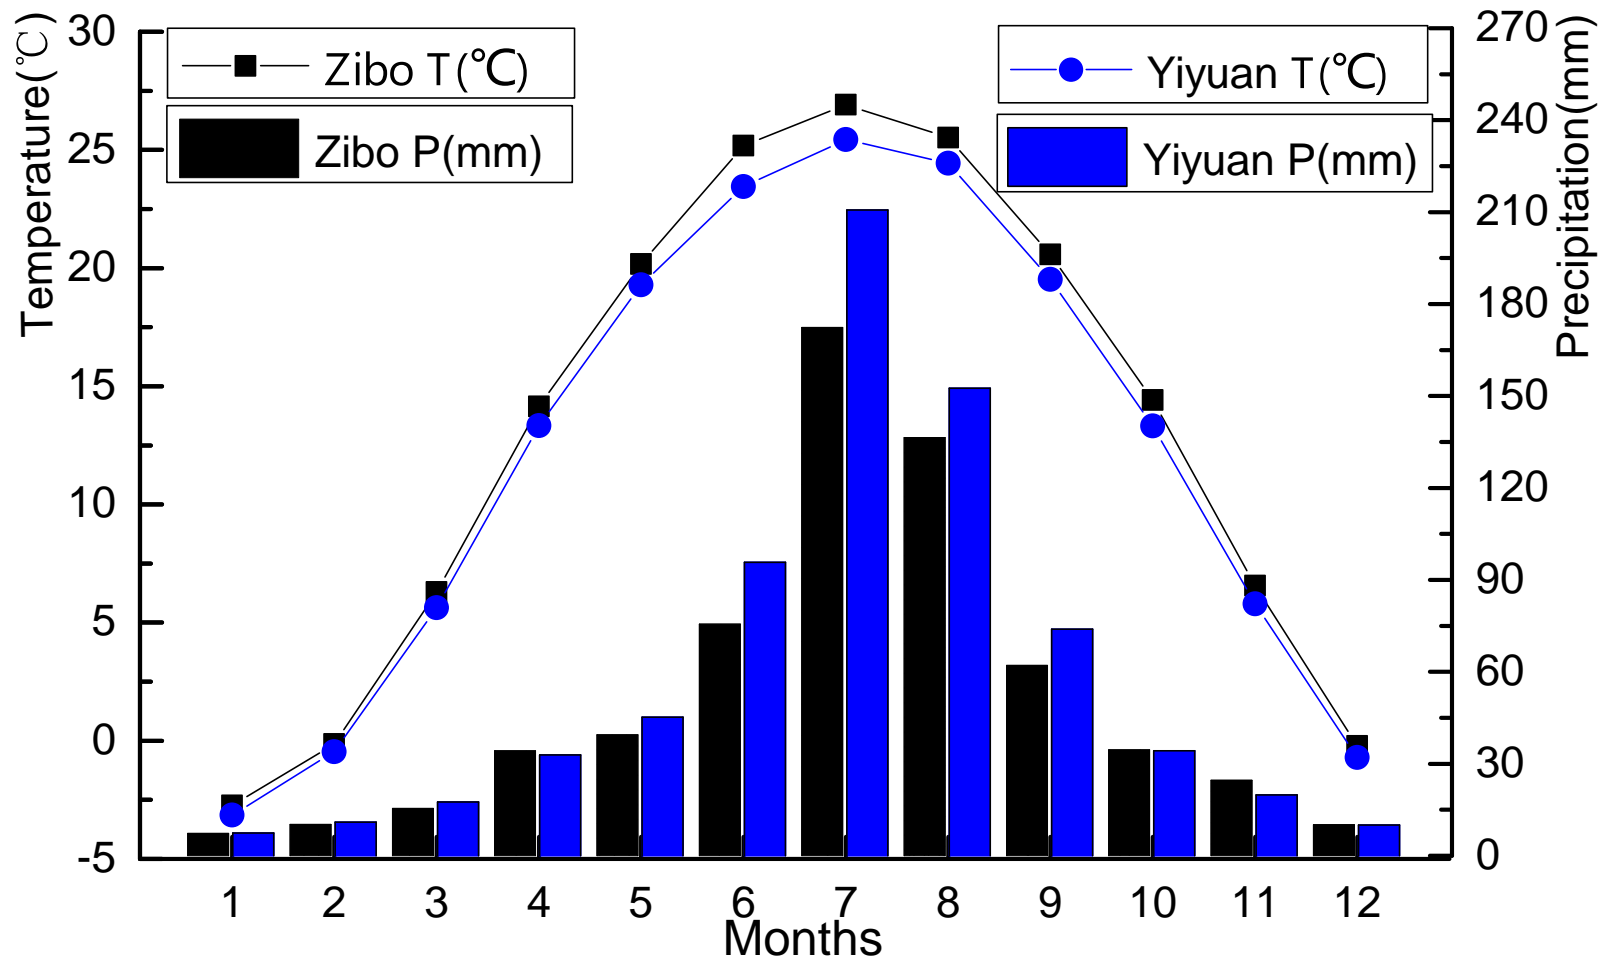

Supplement: Supplementary file 4 [file cp-2017-73-supplement.zip]

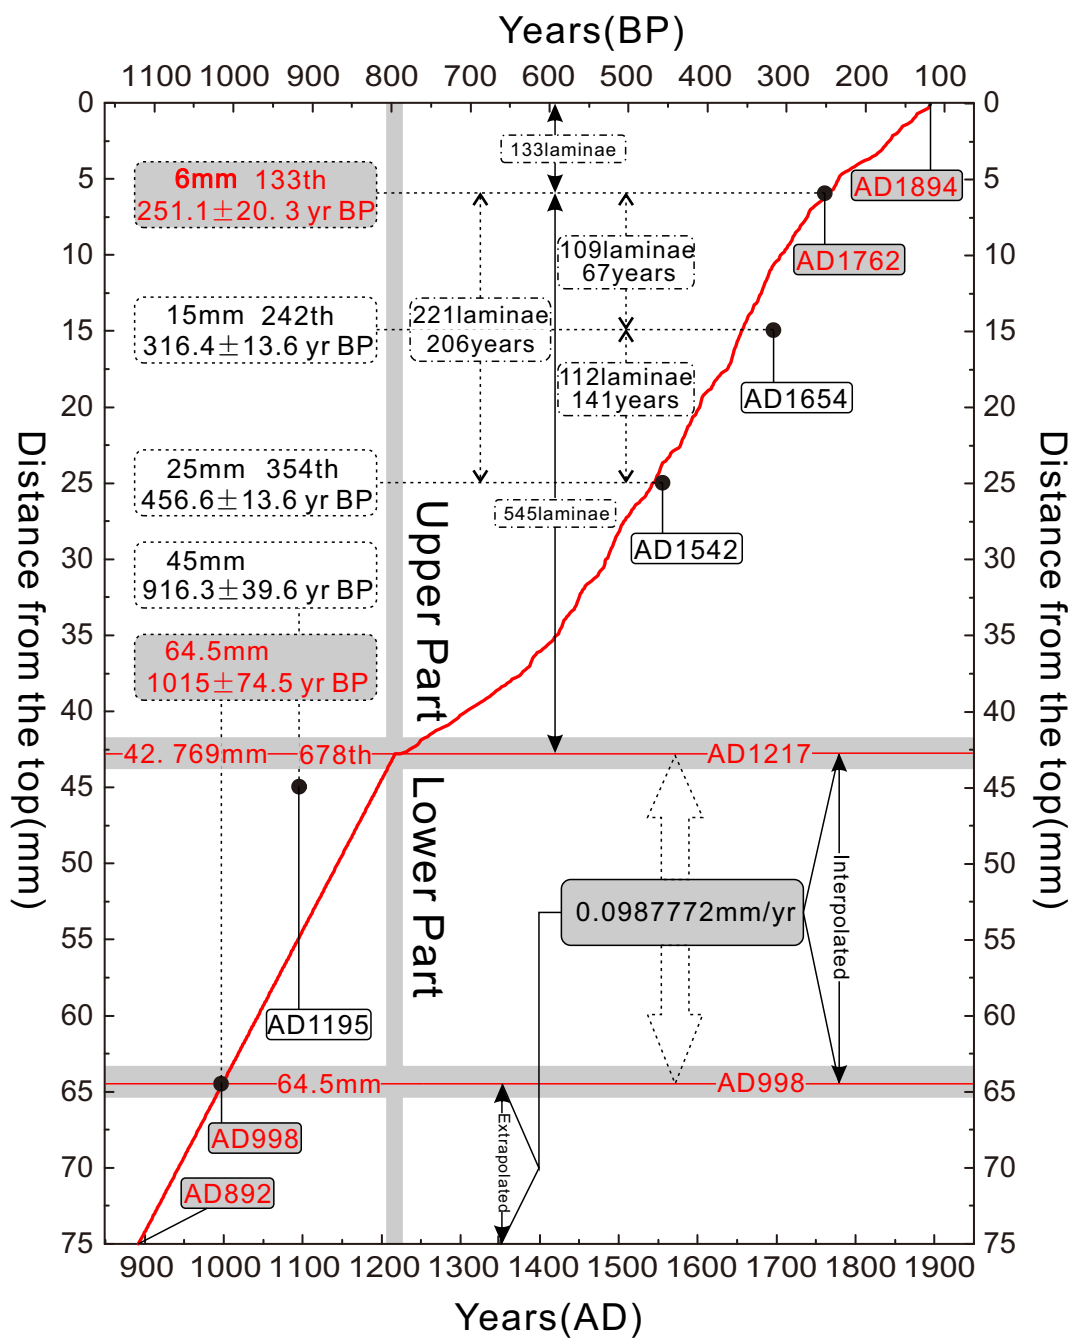

Supplement: Supplementary file 5 [file cp-2017-73-supplement.zip]

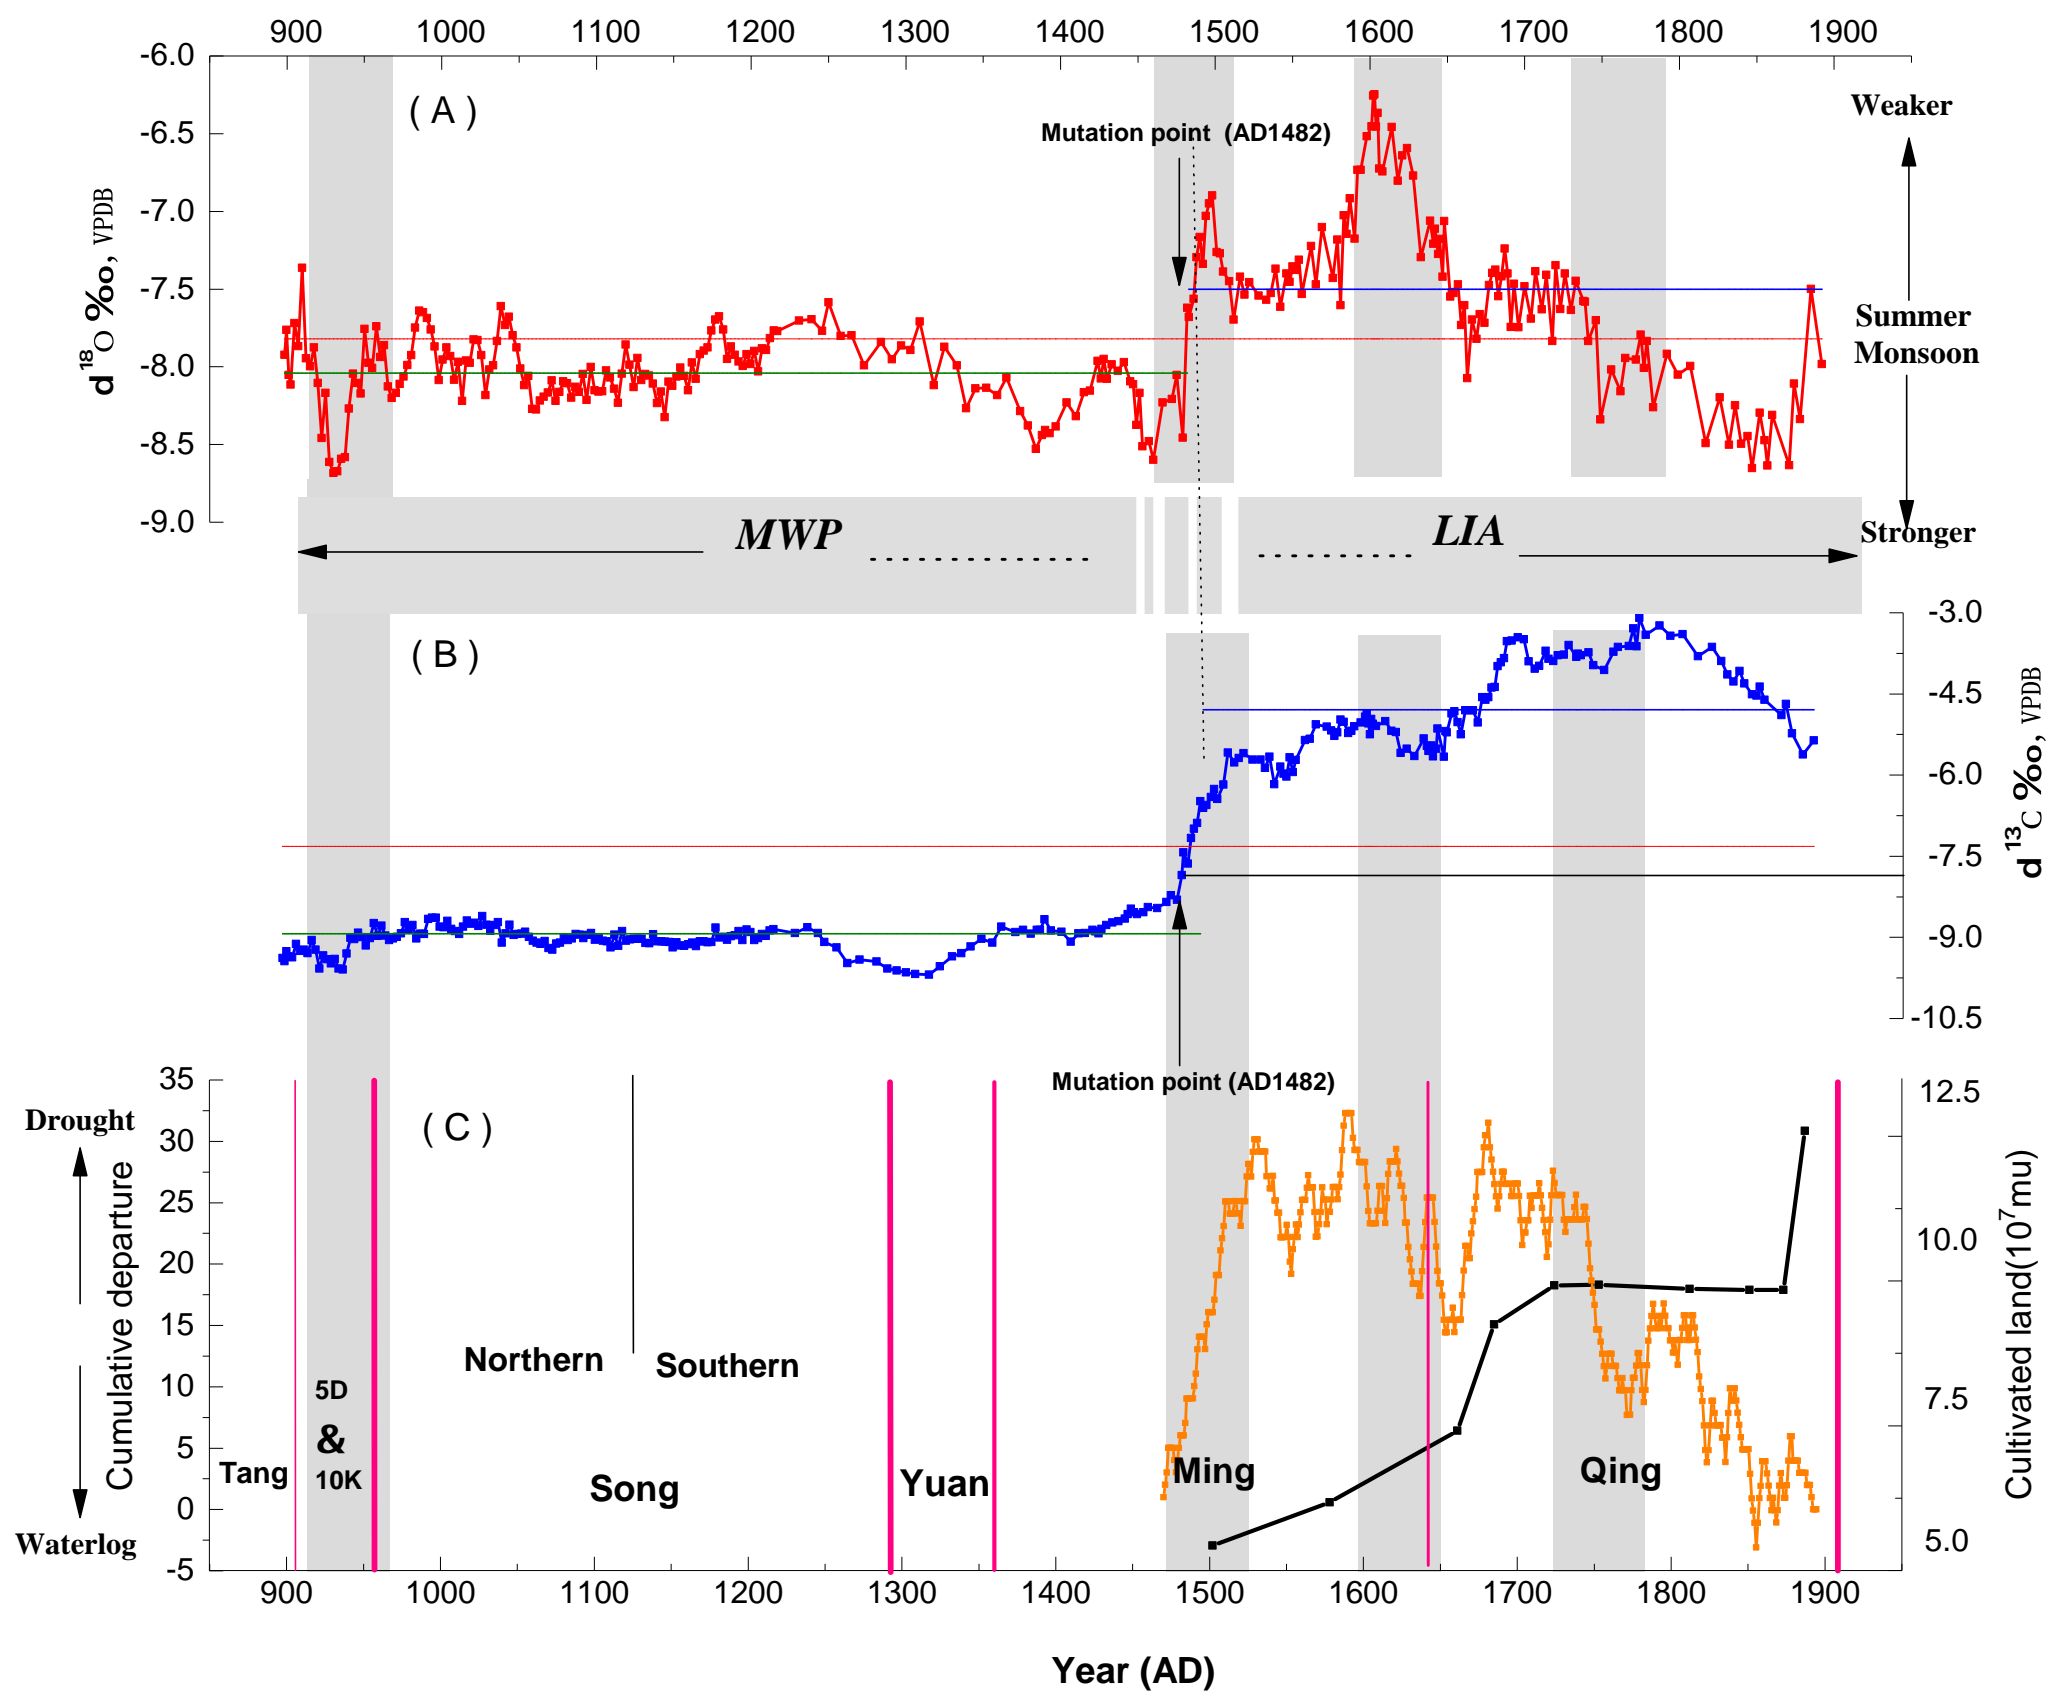

Supplement: Supplementary file 6 [file cp-2017-73-supplement.zip]

Year(AD)

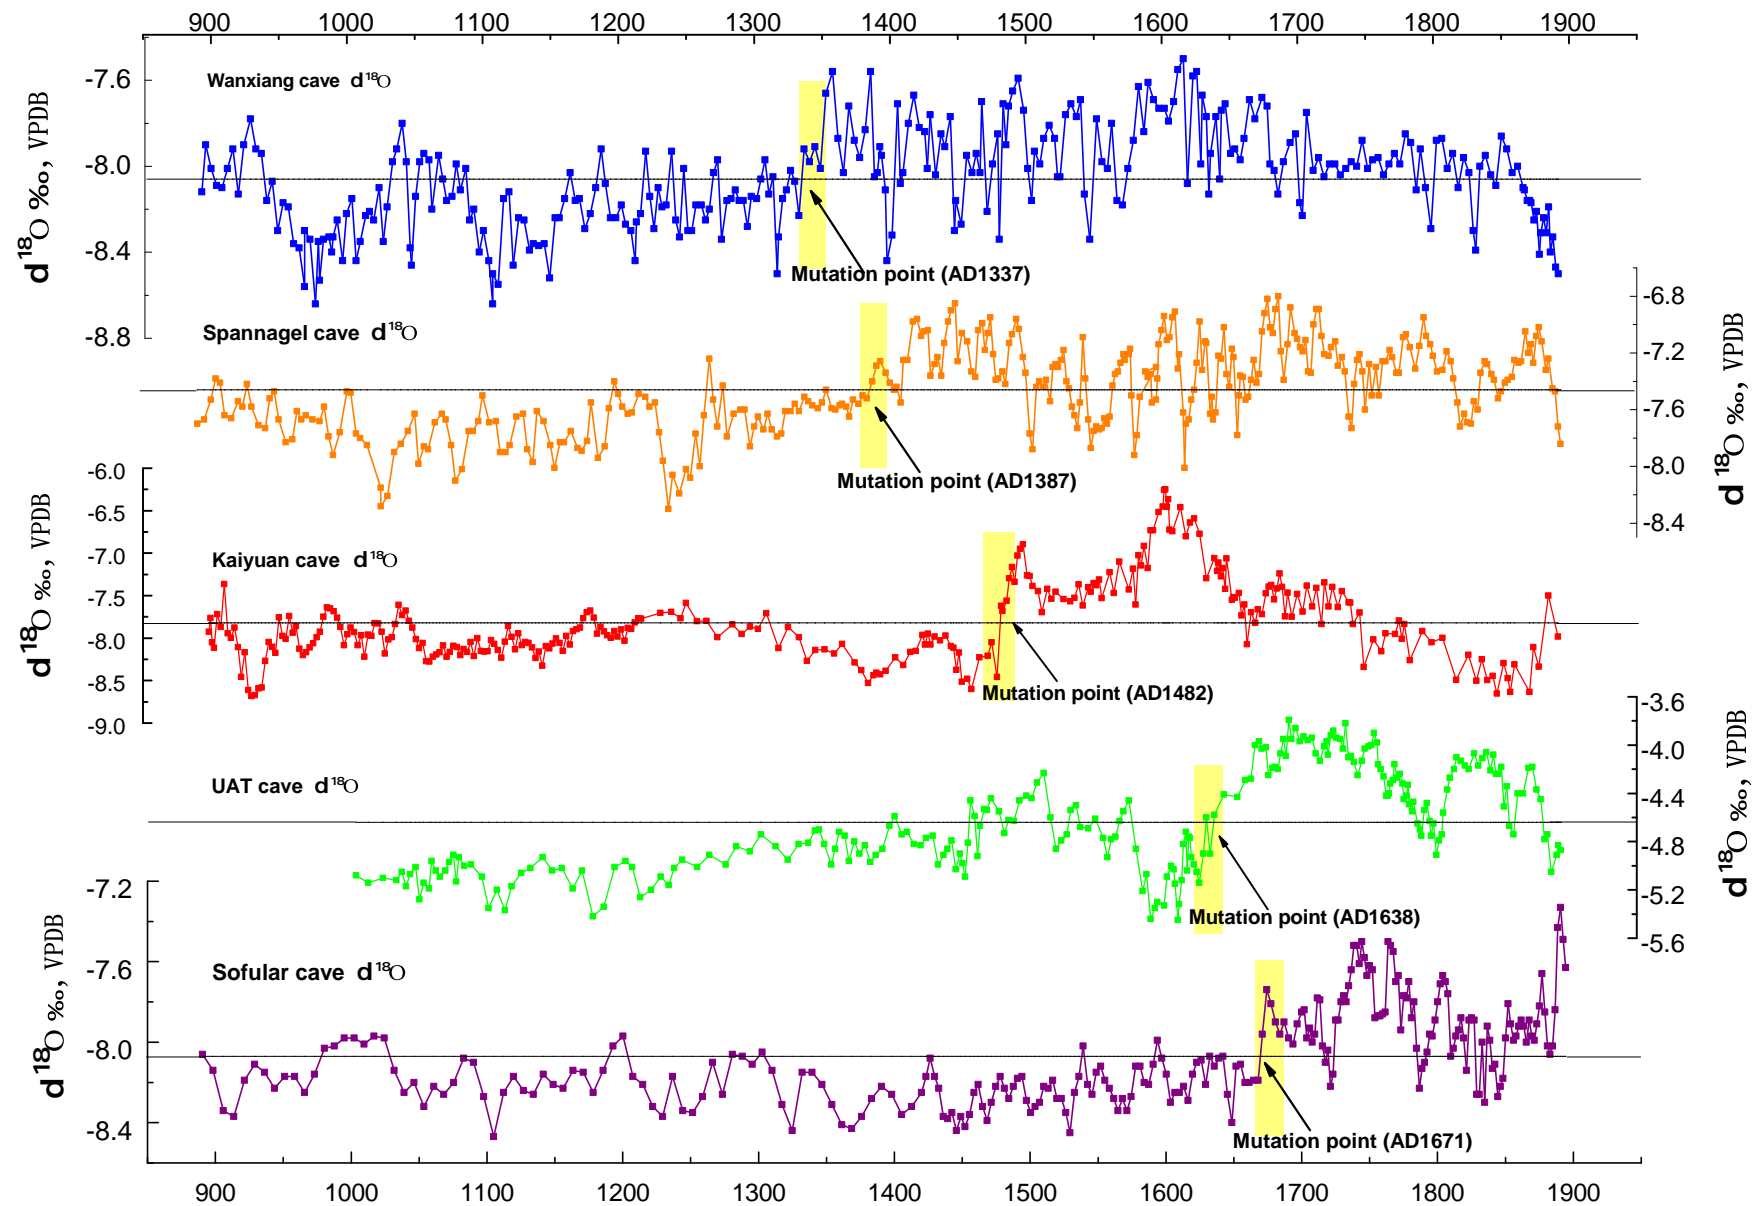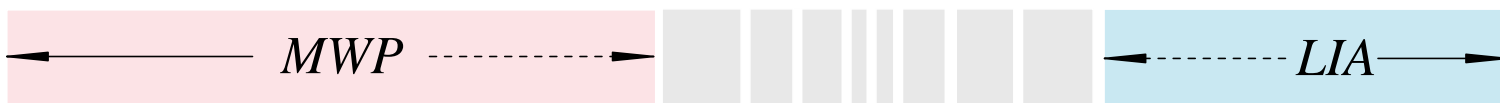

Supplement: Supplementary file 7 [file cp-2017-73-supplement.zip]
